# Supplementary material for: Assessment of Tumor Heterogeneity, as Evidenced by Gene Expression Profiles, Pathway Activation, and Gene Copy Number, in Patients with Multifocal Invasive Lobular Breast Tumors
Source: PubMed Central journal article supplement (PMC4831790; doi:10.1371/journal.pone.0153411), 2016-04-14

● focus 1 (3 punches)  
■ focus 2 (3 punches)

NanoString Copy Number: Patient 2, Chr 1

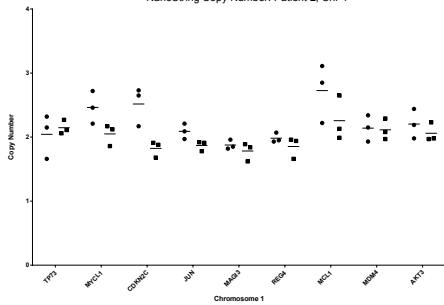

● focus 1 (3 punches)  
■ focus 2 (3 punches)

NanoString Copy Number: Patient 2, Chr 2 and 3

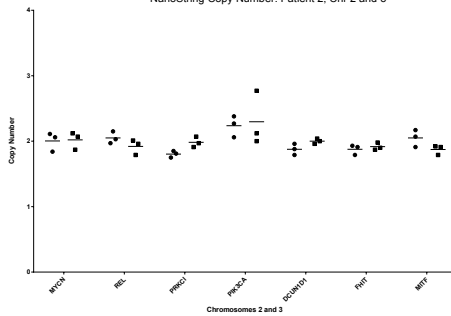

● focus 1 (3 punches)  
■ focus 2 (3 punches)

NanoString Copy Number: Patient 2, Chr 4 and 5

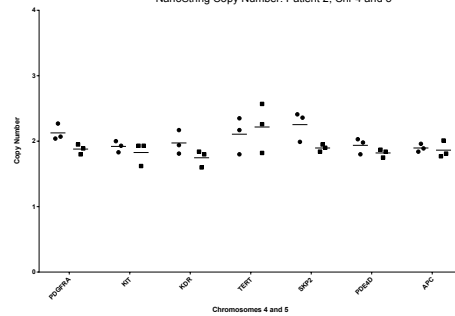

● focus 1 (3 punches)  
■ focus 2 (3 punches)

NanoString Copy Number: Patient 2, Chr 6 and 7

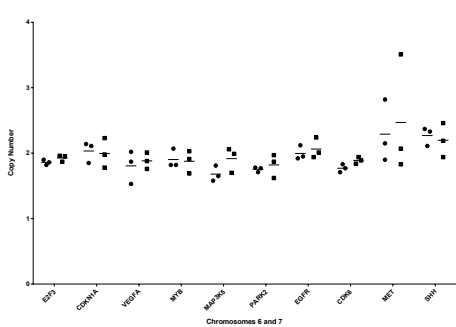

● focus 1 (3 punches)  
■ focus 2 (3 punches)

NanoString Copy Number: Patient 2, Chr 8, 9 and 10

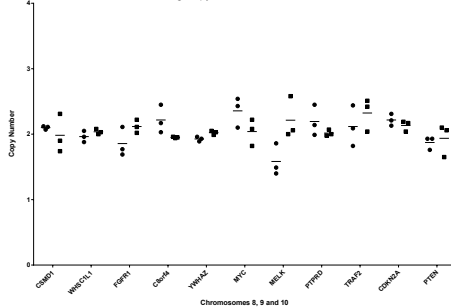

● focus 1 (3 punches)  
■ focus 2 (3 punches)

NanoString Copy Number: Patient 2, Chr 11

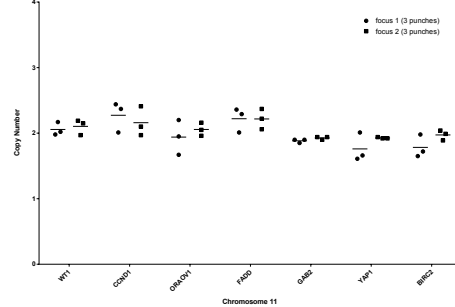

● focus 1 (3 punches)  
■ focus 2 (3 punches)

NanoString Copy Number: Patient 2, Chr 12 and 13

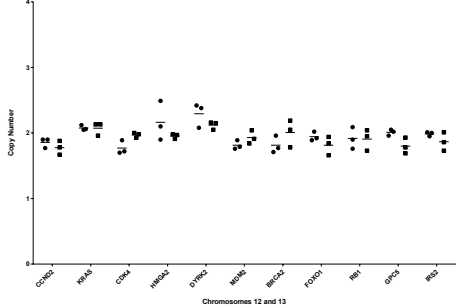

● focus 1 (3 punches)  
■ focus 2 (3 punches)

NanoString Copy Number: Patient 2, Chr 14 and 15

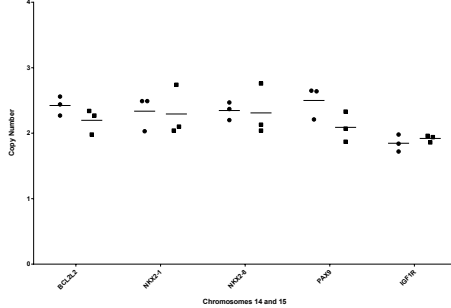

● focus 1 (3 punches)  
■ focus 2 (3 punches)

NanoString Copy Number: Patient 2, Chr 17

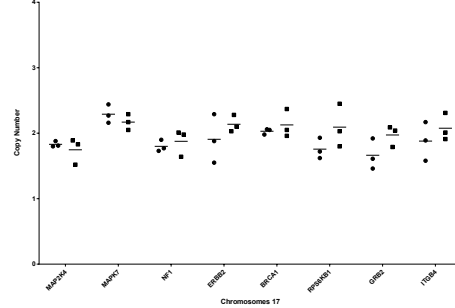

● focus 1 (3 punches)  
■ focus 2 (3 punches)

NanoString Copy Number: Patient 2, Chr 18 to 22

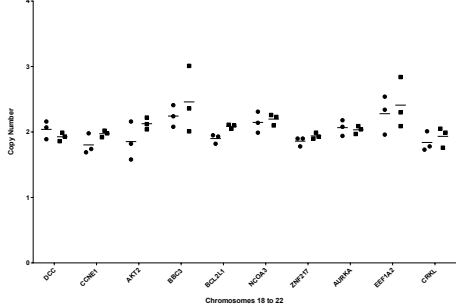

● focus 1 (3 punches)  
■ focus 2 (3 punches)

NanoString Copy Number: Patient 2, Chr X

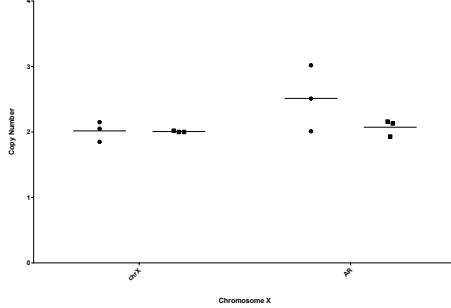

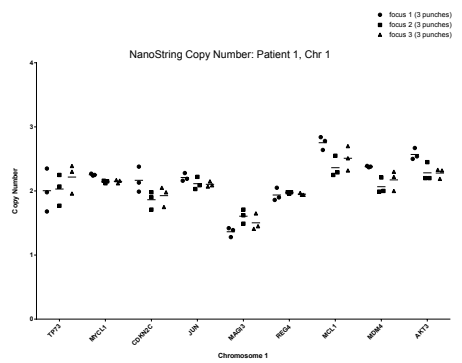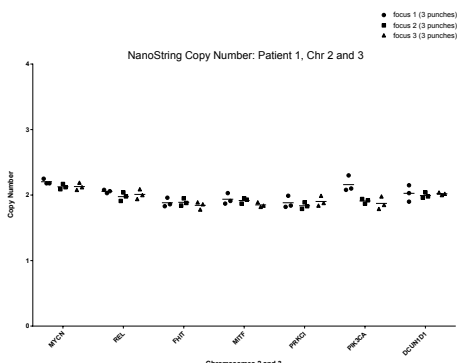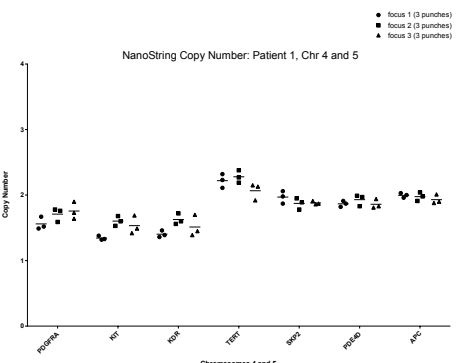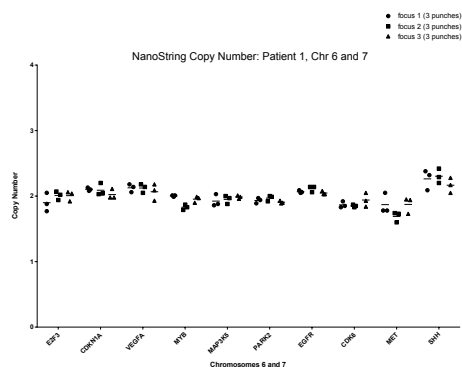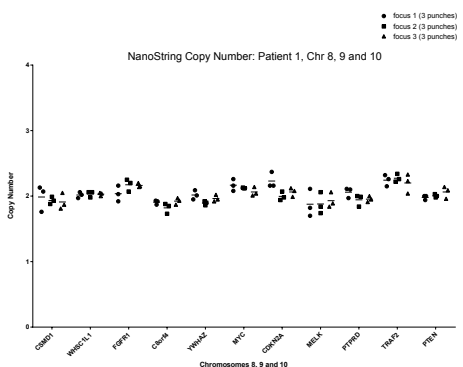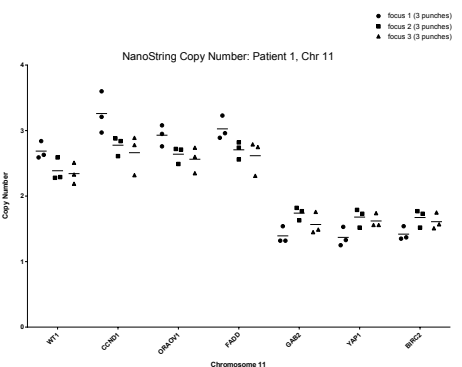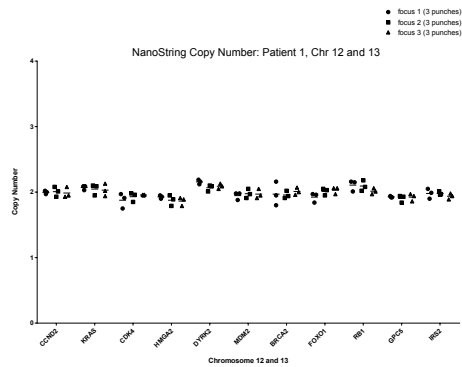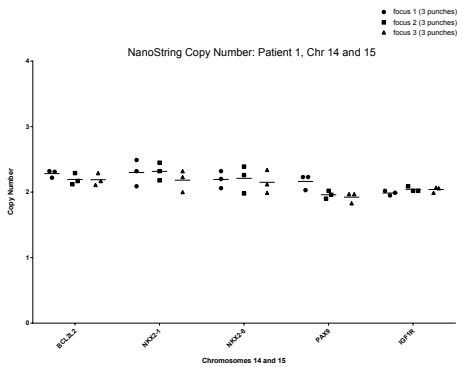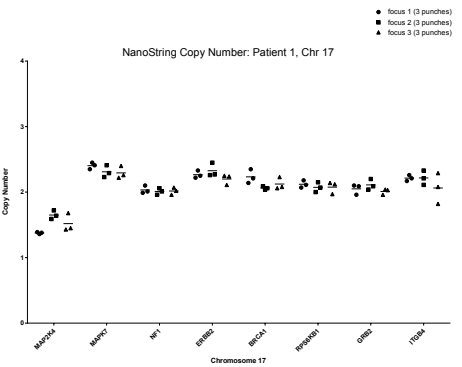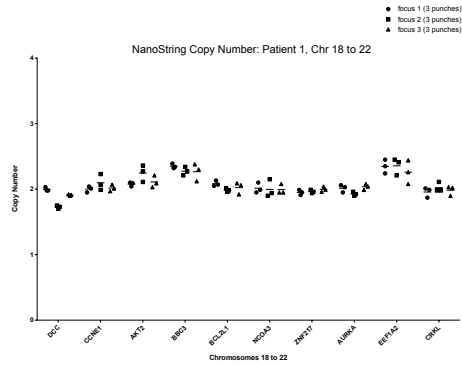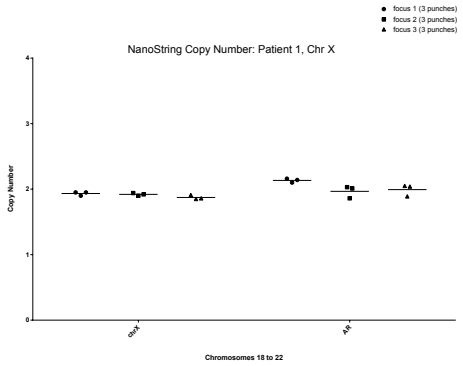

● focus 1 (3 punches)  
■ focus 2 (3 punches)

NanoString Copy Number: Patient 3, Chr 1

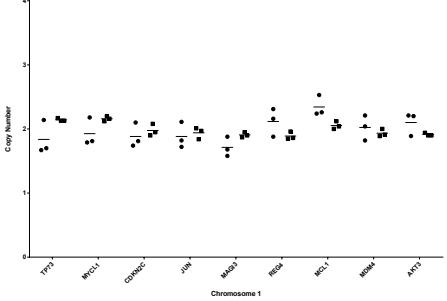

● focus 1 (3 punches)  
■ focus 2 (3 punches)

NanoString Copy Number: Patient 3, Chr 2 and 3

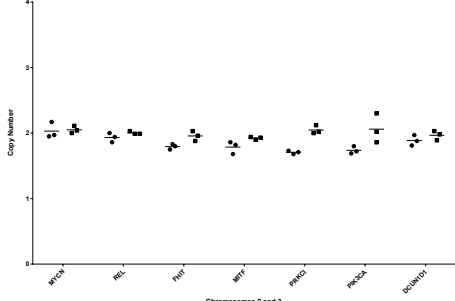

● focus 1 (3 punches)  
■ focus 2 (3 punches)

NanoString Copy Number: Patient 3, Chr 4 and 5

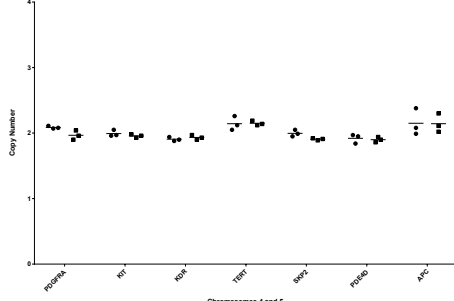

● focus 1 (3 punches)  
■ focus 2 (3 punches)

NanoString Copy Number: Patient 3, Chr 6 and 7

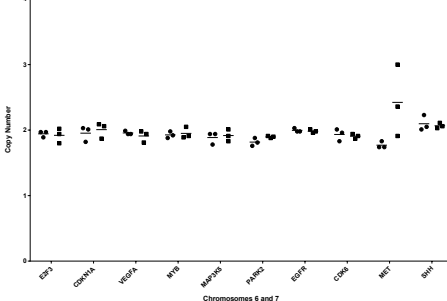

● focus 1 (3 punches)  
■ focus 2 (3 punches)

NanoString Copy Number: Patient 3, Chr 8, 9 and 10

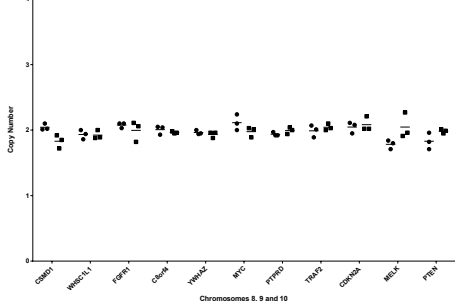

● focus 1 (3 punches)  
■ focus 2 (3 punches)

NanoString Copy Number: Patient 3, Chr 11

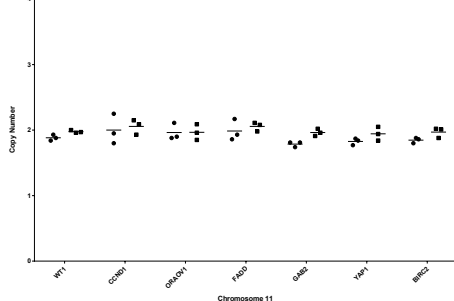

● focus 1 (3 punches)  
■ focus 2 (3 punches)

NanoString Copy Number: Patient 3, Chr 12 and 13

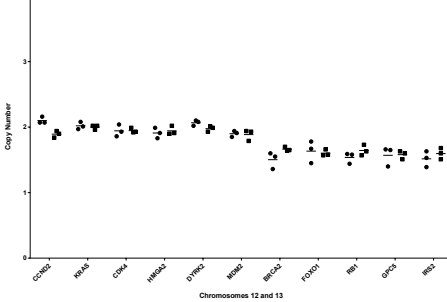

● focus 1 (3 punches)  
■ focus 2 (3 punches)

NanoString Copy Number: Patient 3, Chr 14 and 15

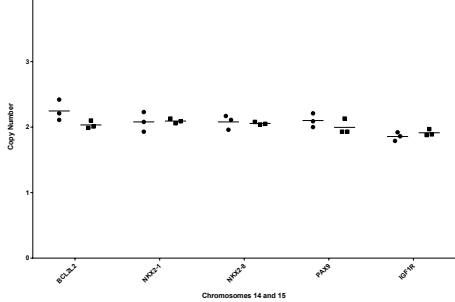

● focus 1 (3 punches)  
■ focus 2 (3 punches)

NanoString Copy Number: Patient 3, Chr 17

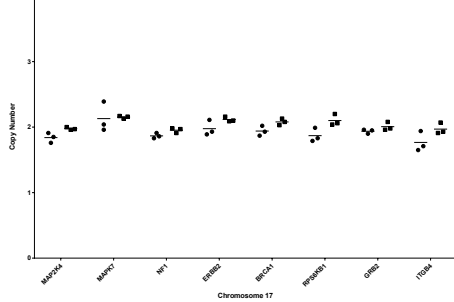

● focus 1 (3 punches)  
■ focus 2 (3 punches)

NanoString Copy Number: Patient 3, Chr 18 to 22

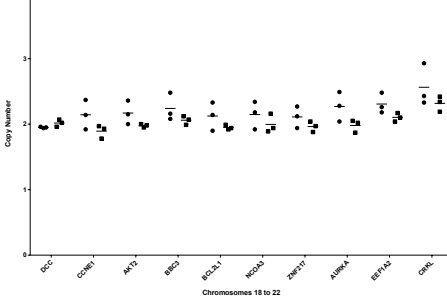

● focus 1 (3 punches)  
■ focus 2 (3 punches)

NanoString Copy Number: Patient 3, Chr X

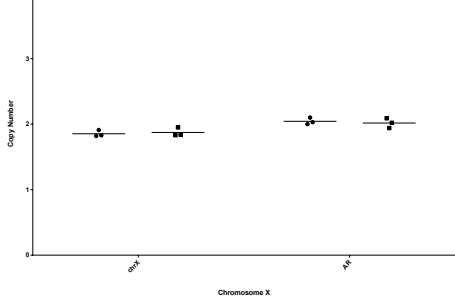

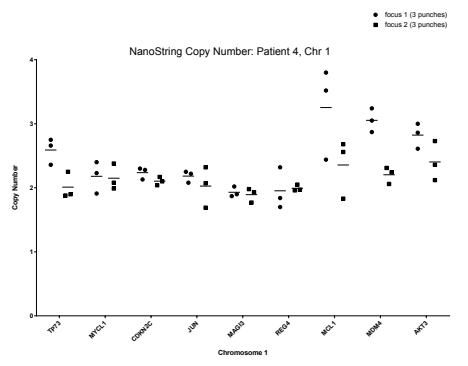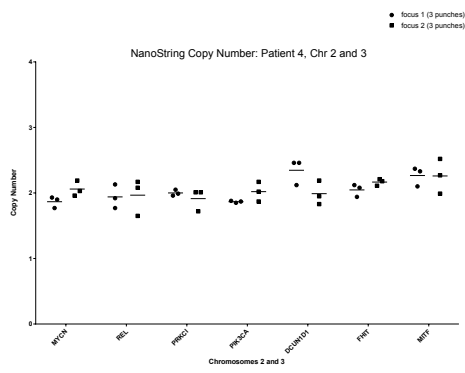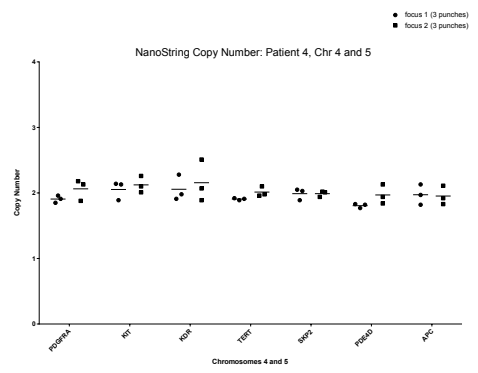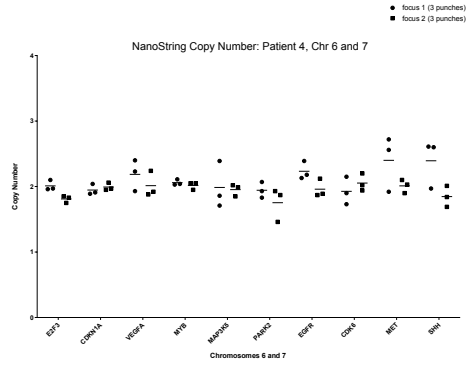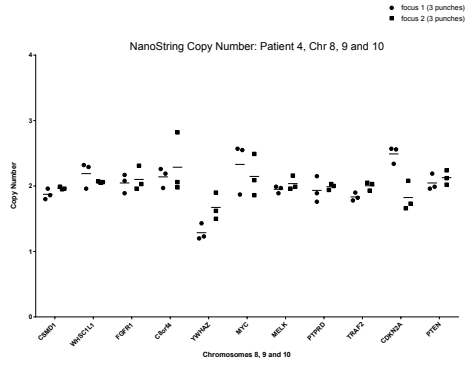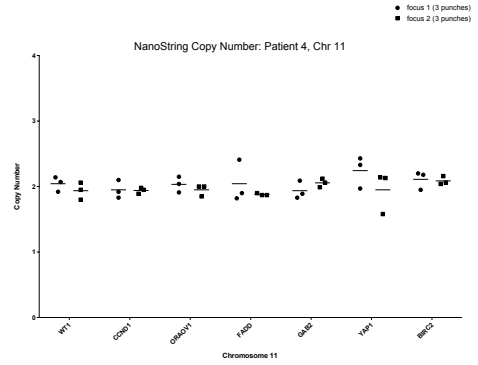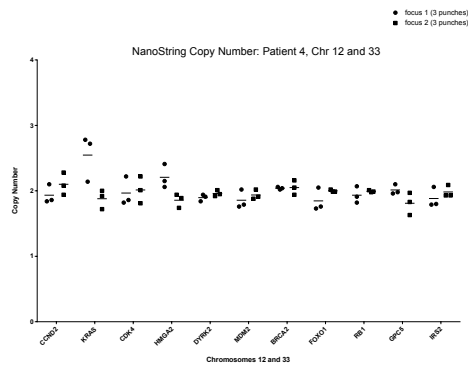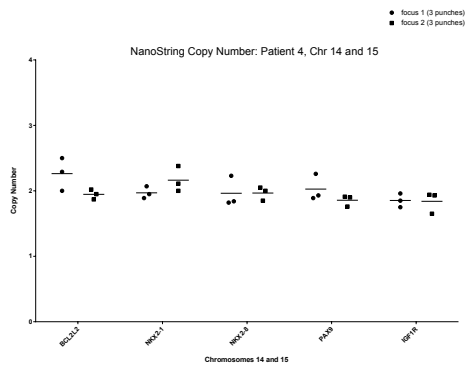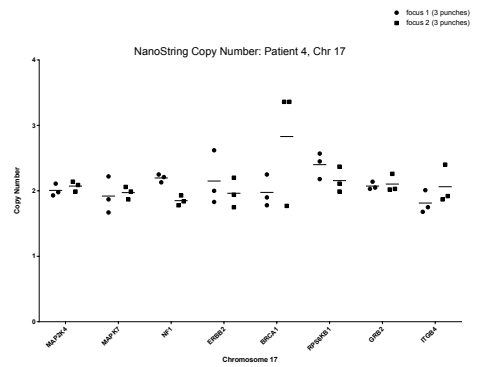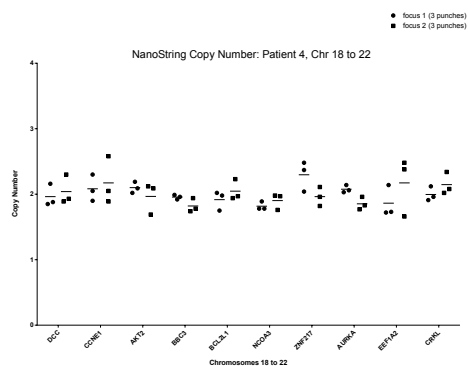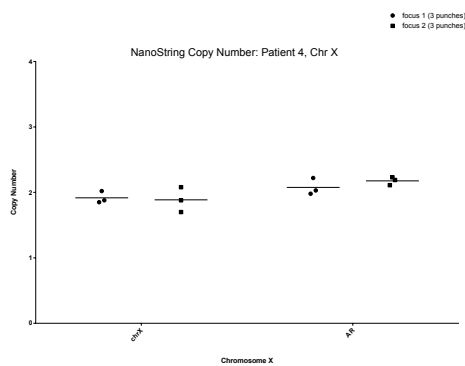

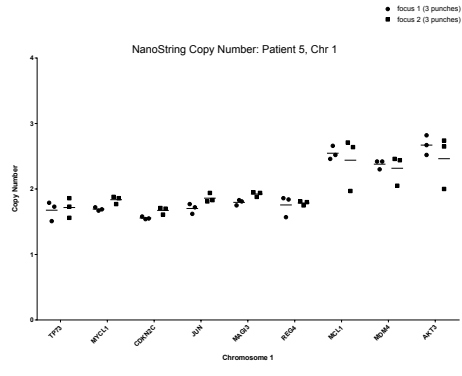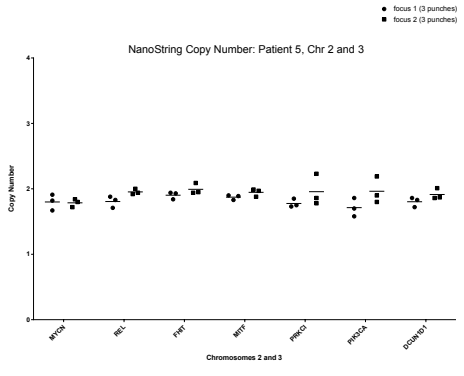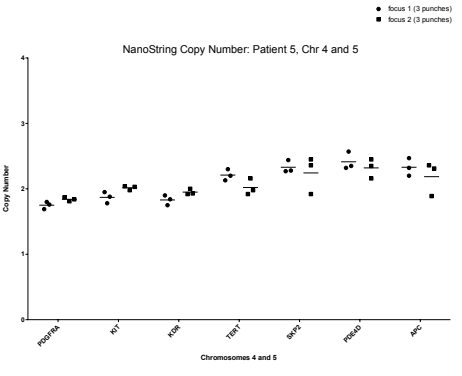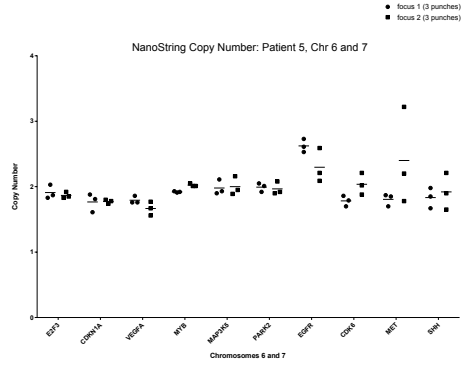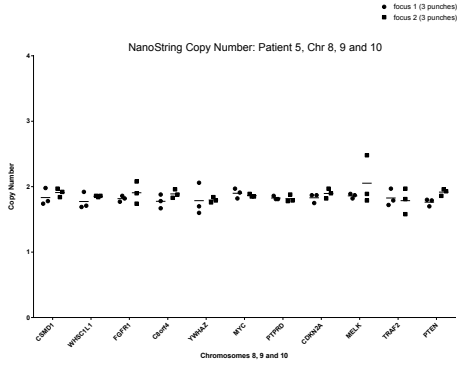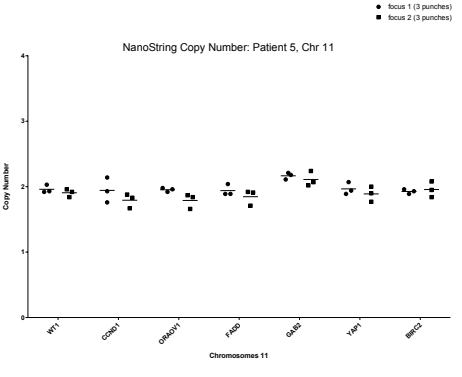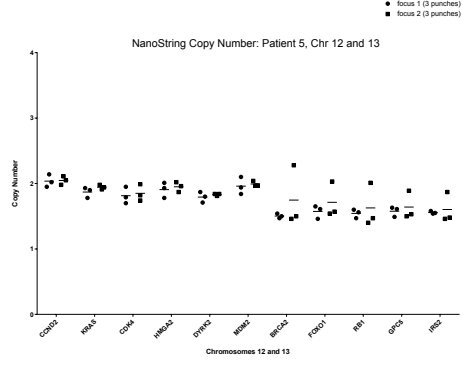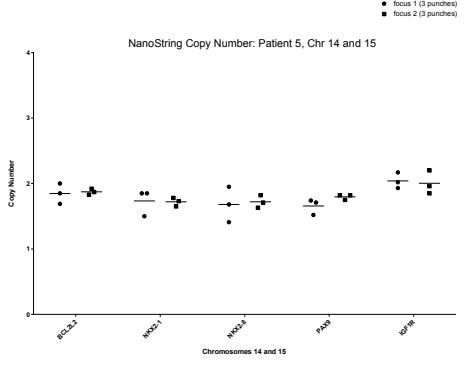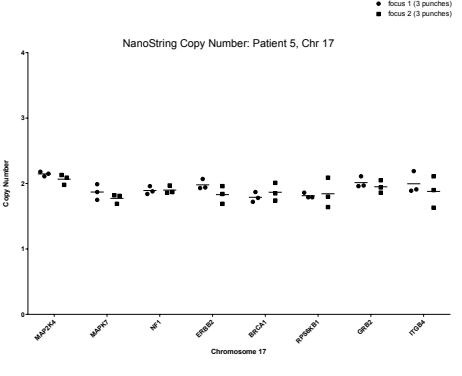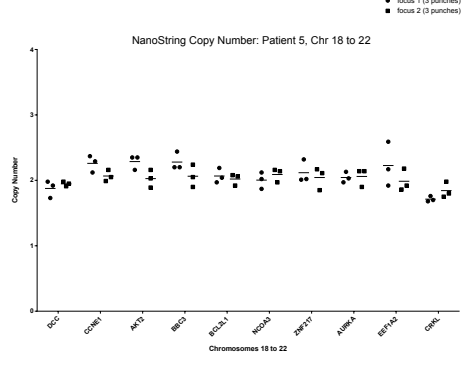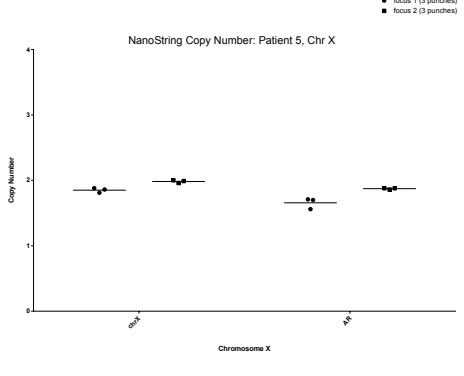

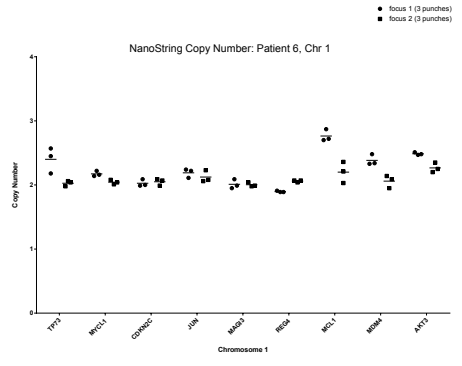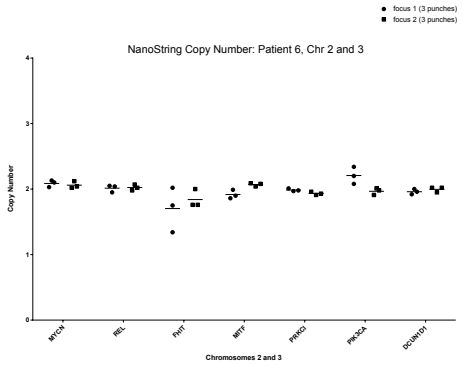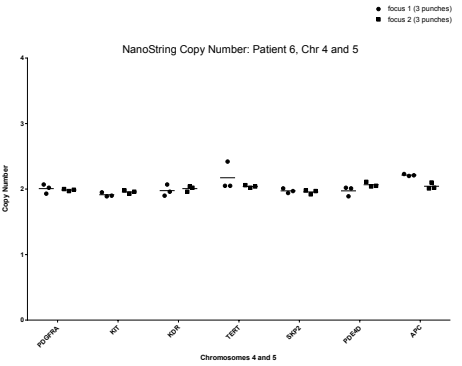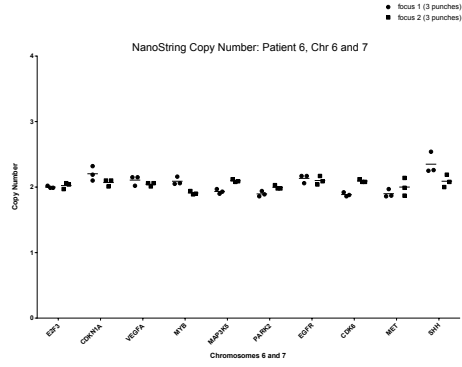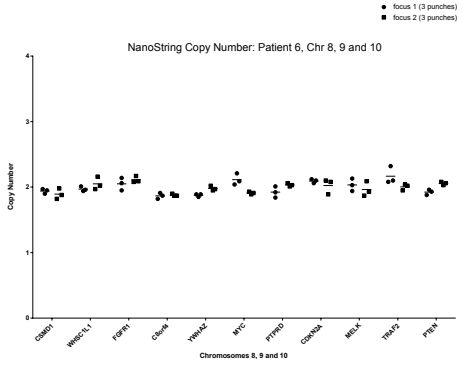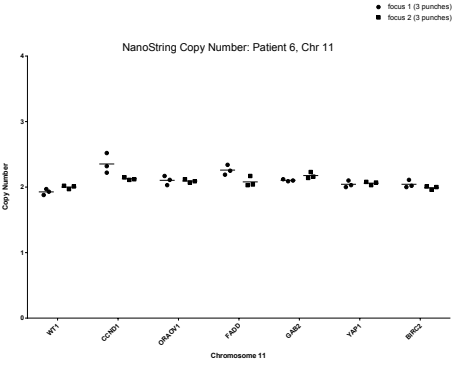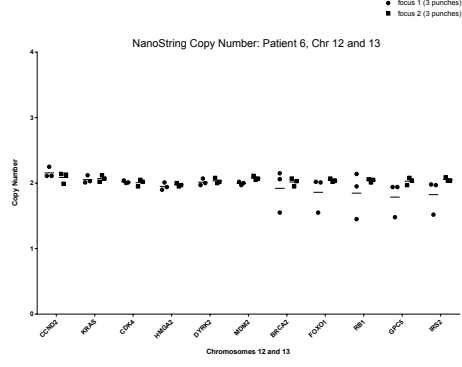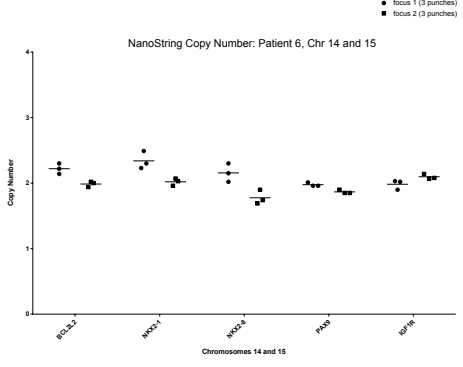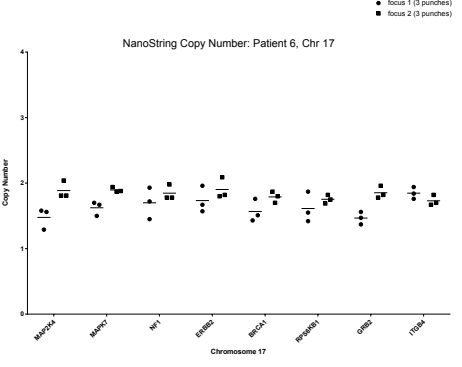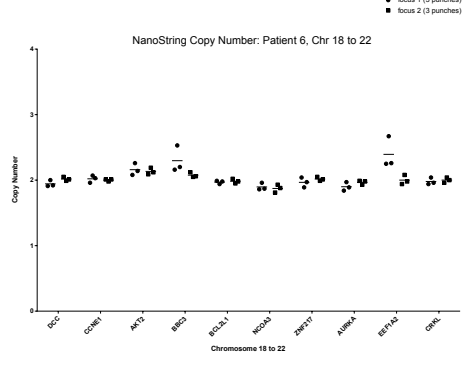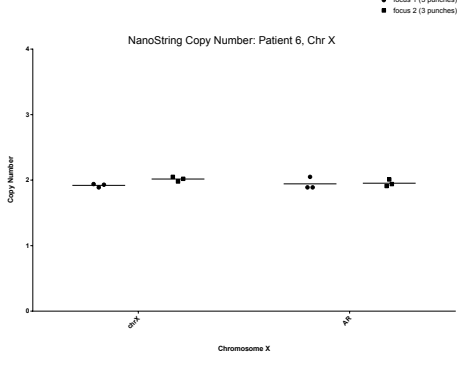

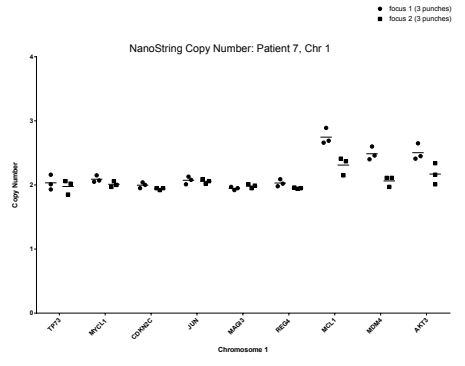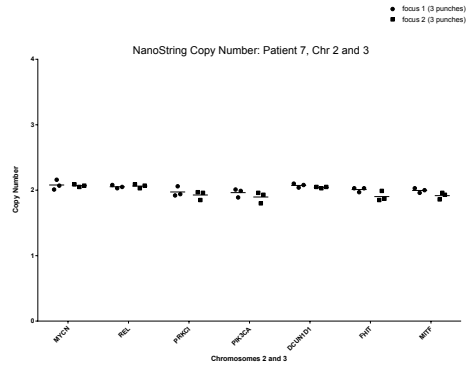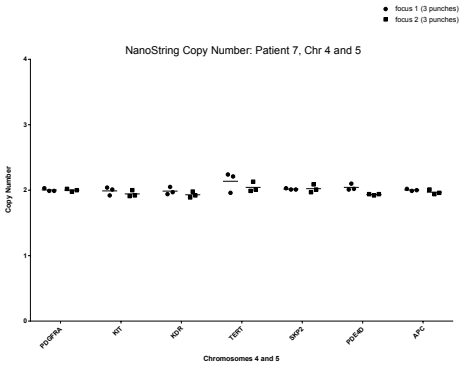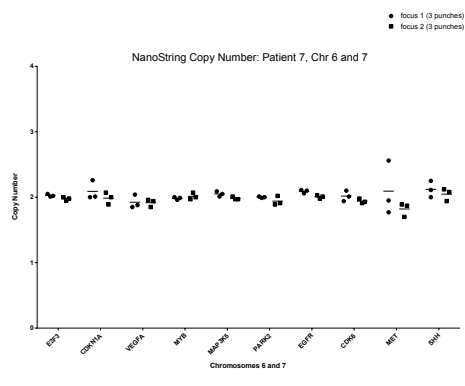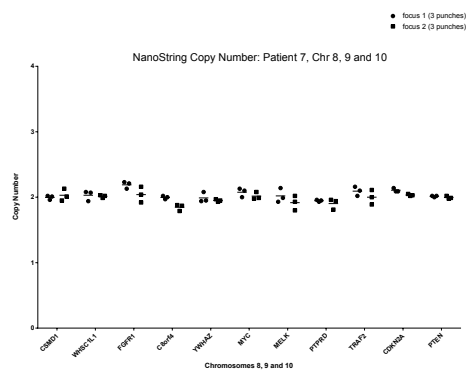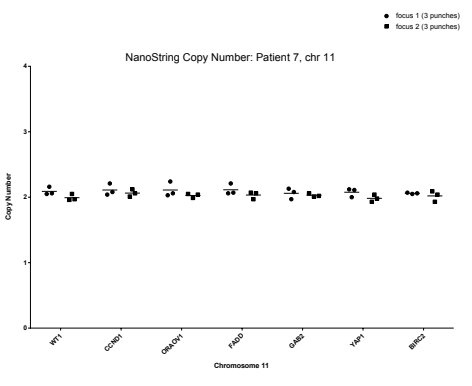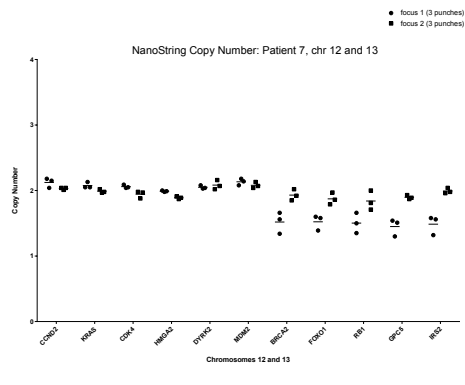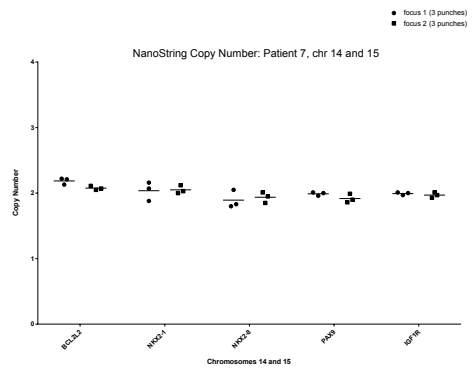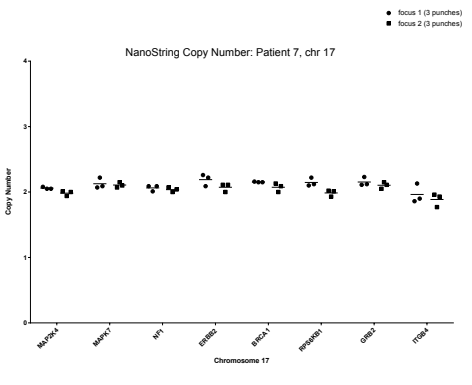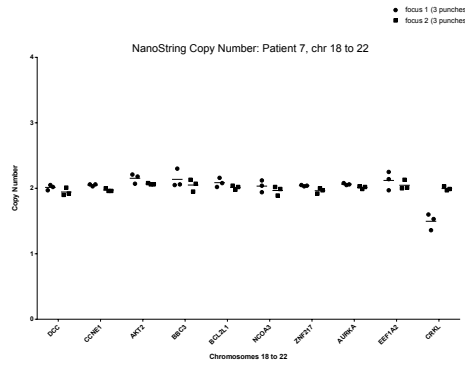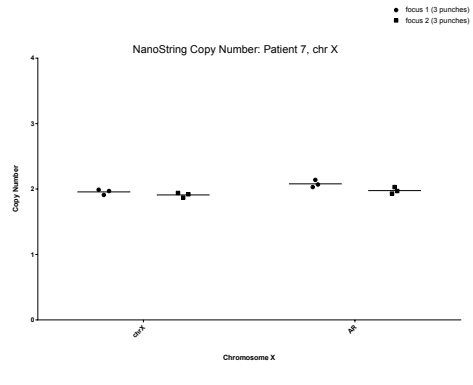

● focus 1 (3 punches)  
■ focus 2 (3 punches)

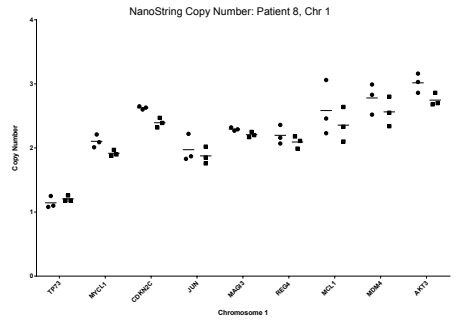

● focus 1 (3 punches)  
■ focus 2 (3 punches)

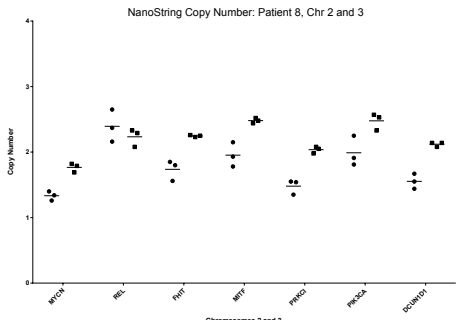

● focus 1 (3 punches)  
■ focus 2 (3 punches)

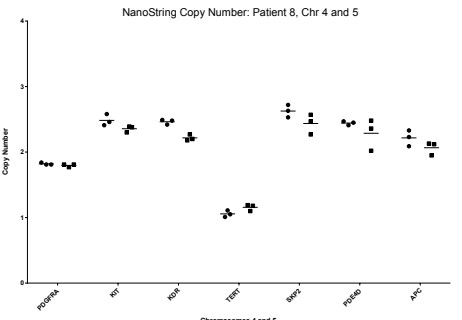

● focus 1 (3 punches)  
■ focus 2 (3 punches)

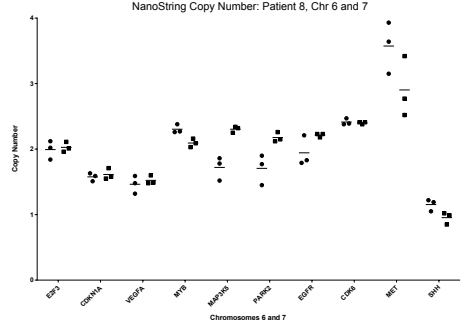

● focus 1 (3 punches)  
■ focus 2 (3 punches)

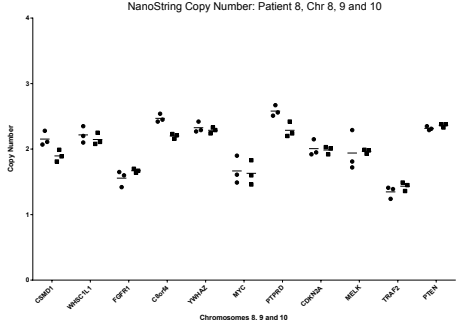

● focus 1 (3 punches)  
■ focus 2 (3 punches)

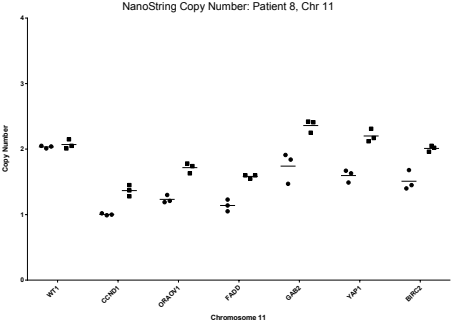

● focus 1 (3 punches)  
■ focus 2 (3 punches)

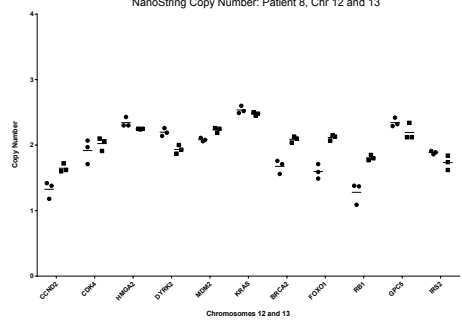

● focus 1 (3 punches)  
■ focus 2 (3 punches)

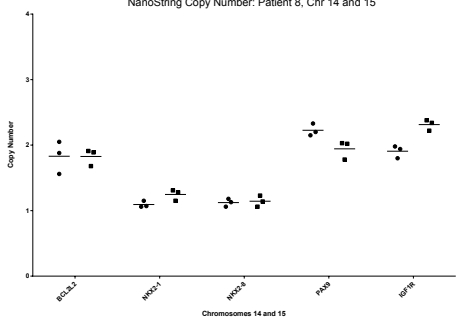

● focus 1 (3 punches)  
■ focus 2 (3 punches)

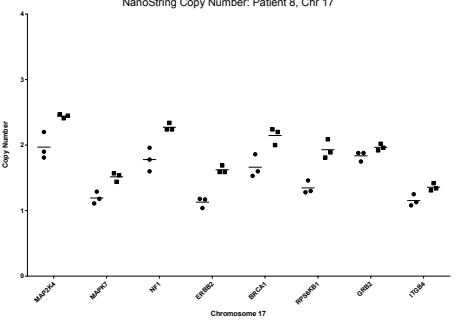

● focus 1 (3 punches)  
■ focus 2 (3 punches)

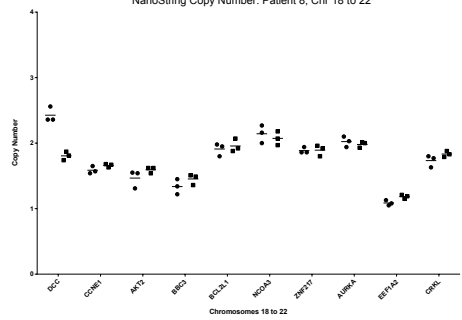

● focus 1 (3 punches)  
■ focus 2 (3 punches)

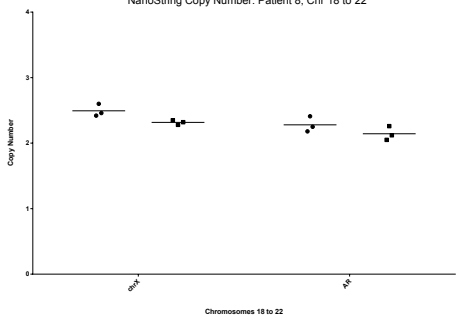



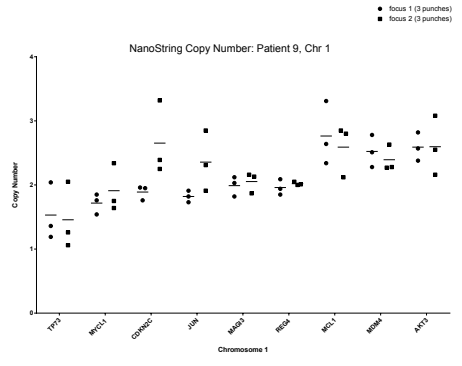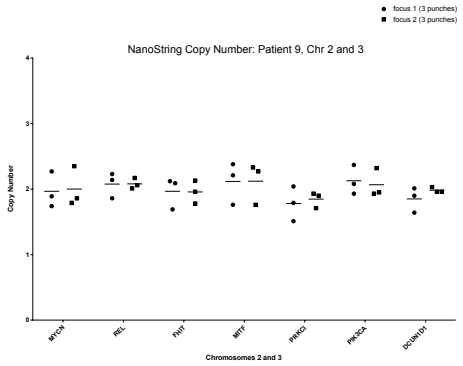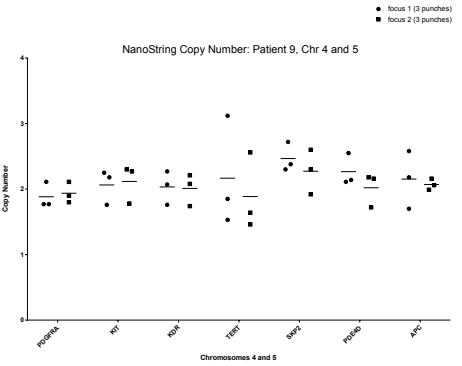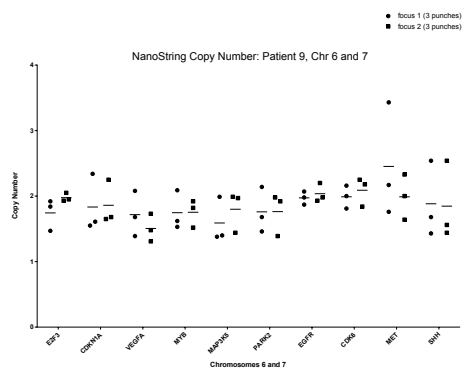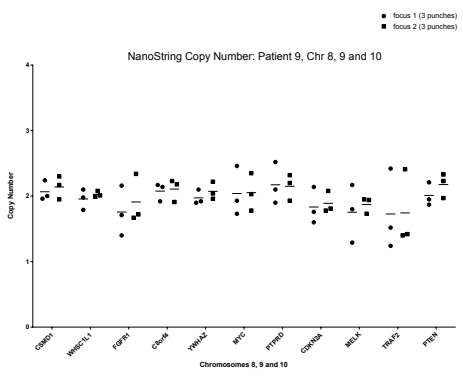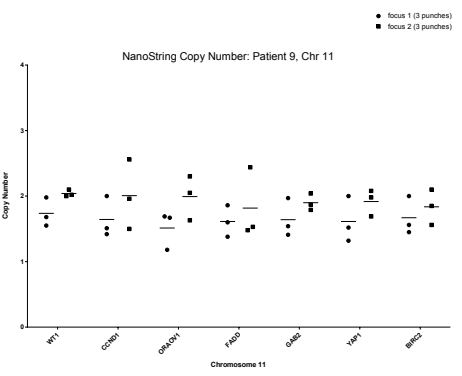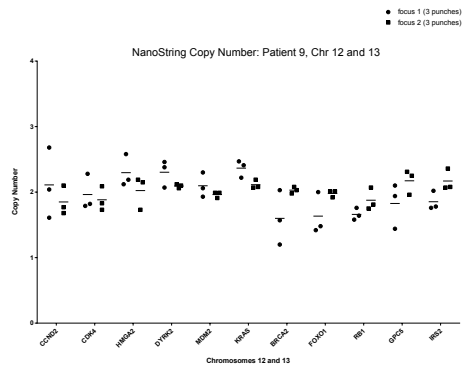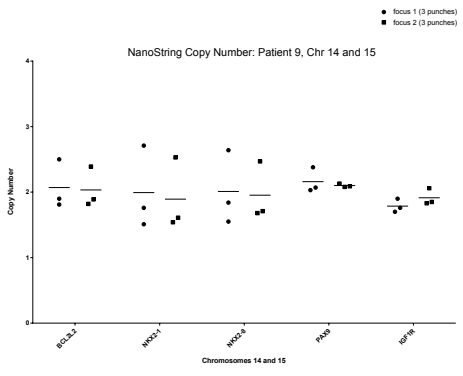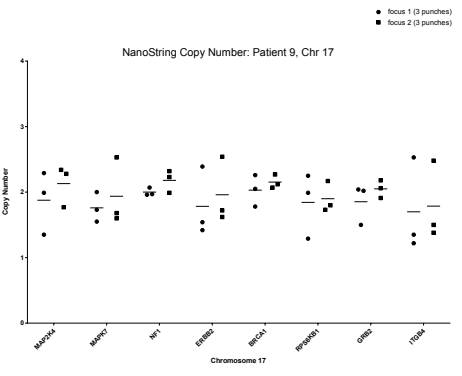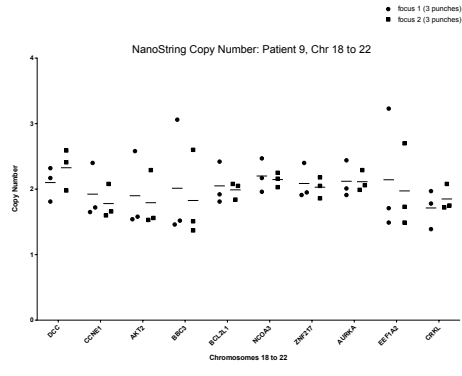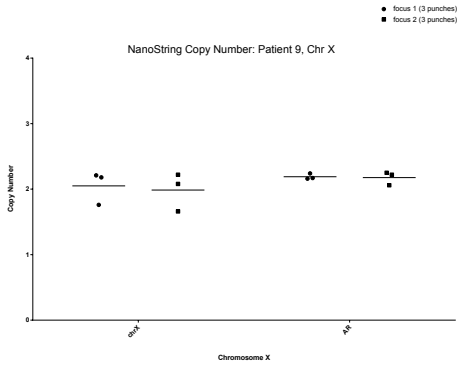

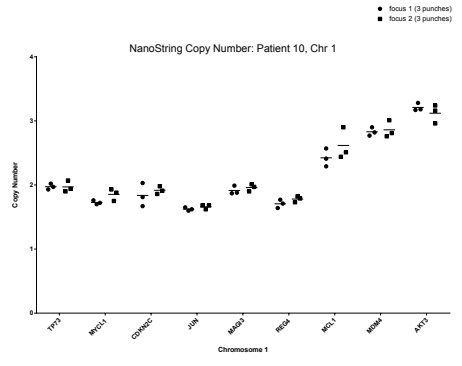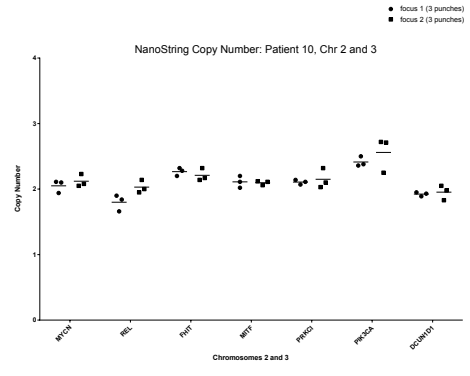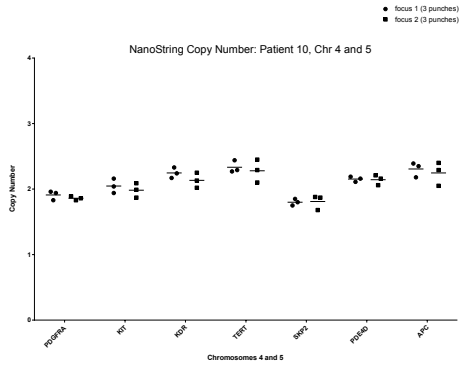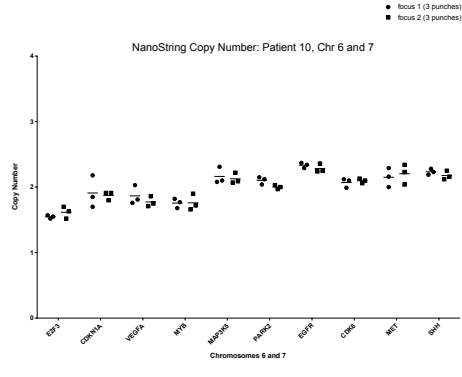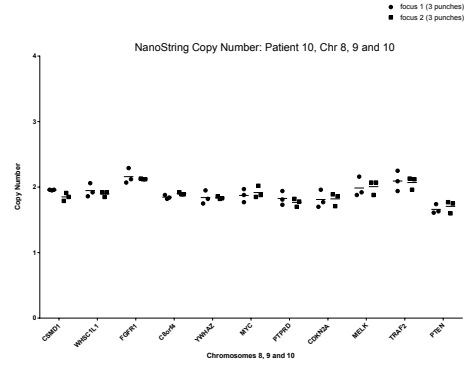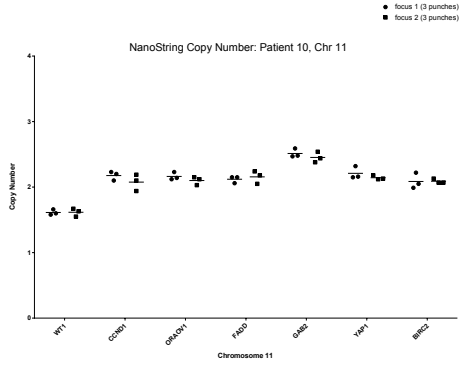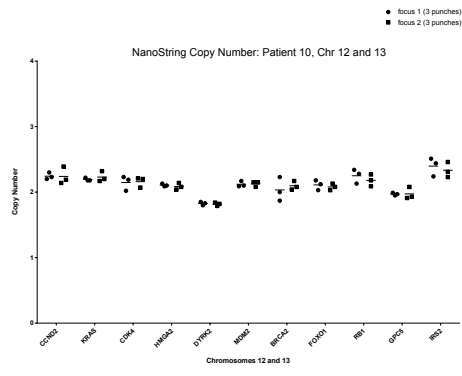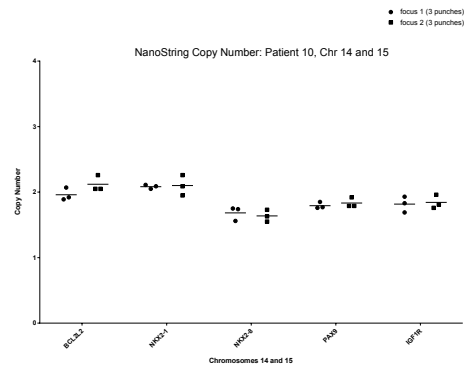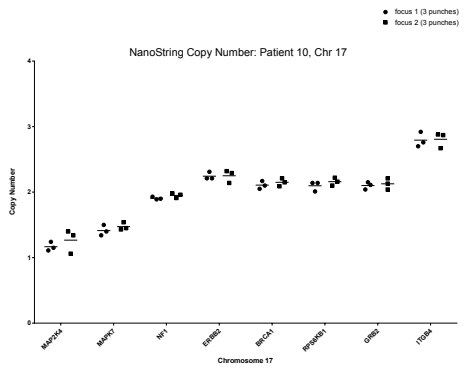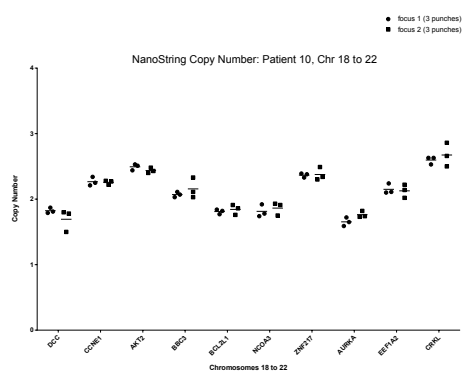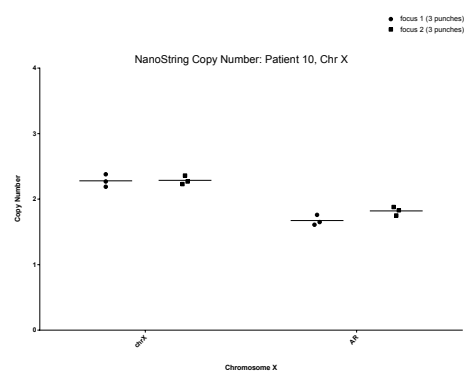

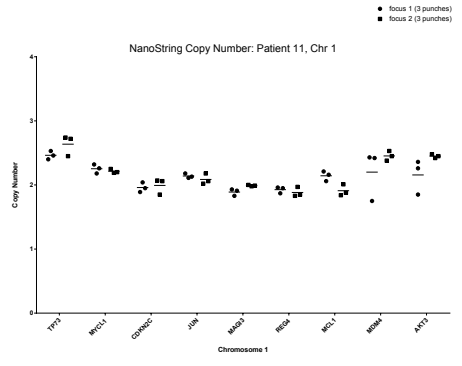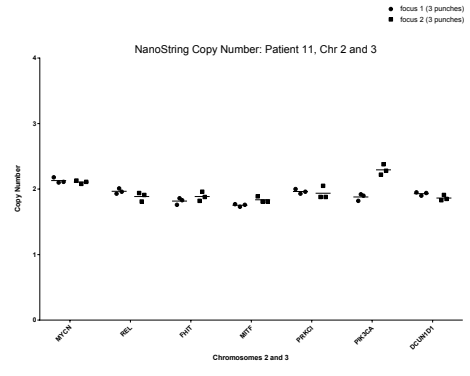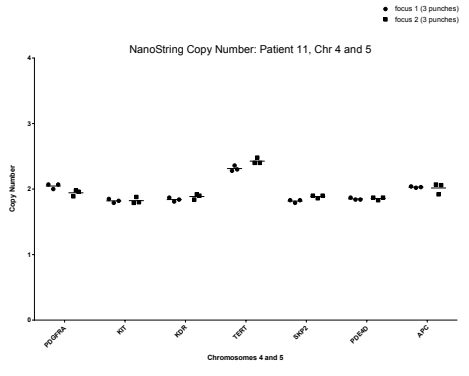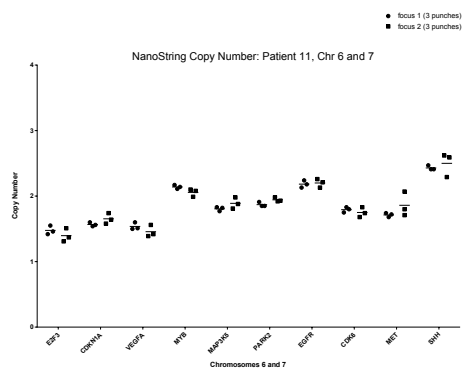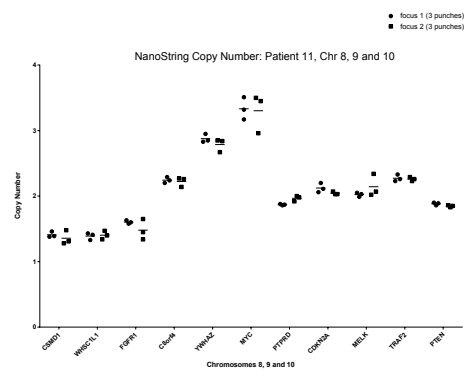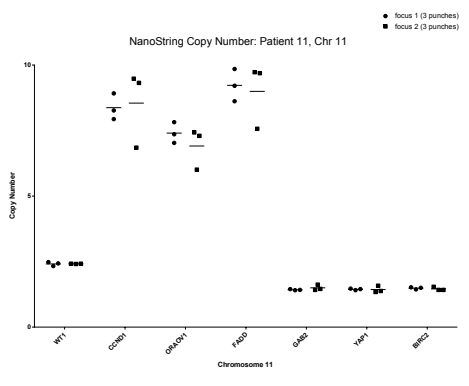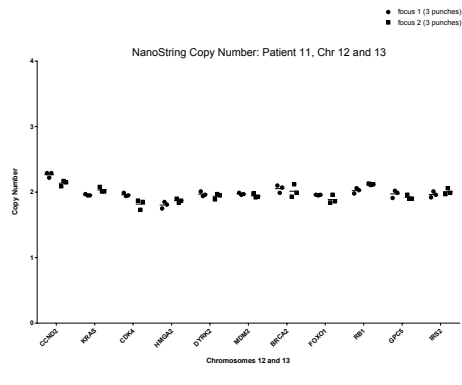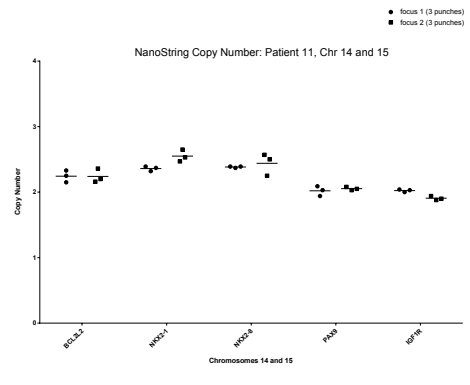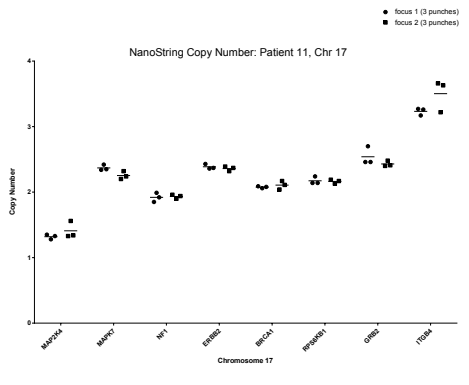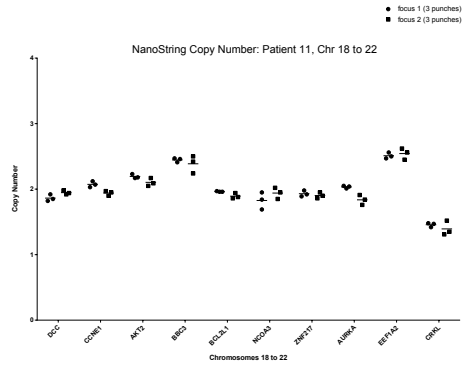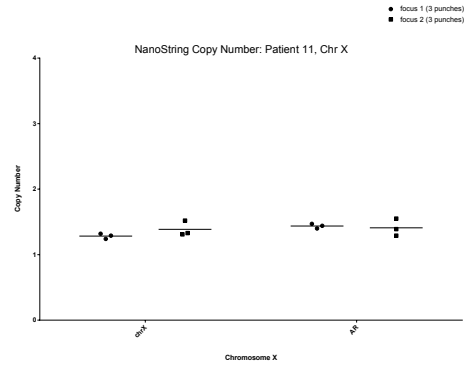

Supplement: pone.0153411.s002.pdf [file pone.0153411.s002.pdf]
