# Supplementary material for: Assessment of Tumor Heterogeneity, as Evidenced by Gene Expression Profiles, Pathway Activation, and Gene Copy Number, in Patients with Multifocal Invasive Lobular Breast Tumors
Source: PubMed Central journal article supplement (PMC4831790; doi:10.1371/journal.pone.0153411), 2016-04-14

# Notch

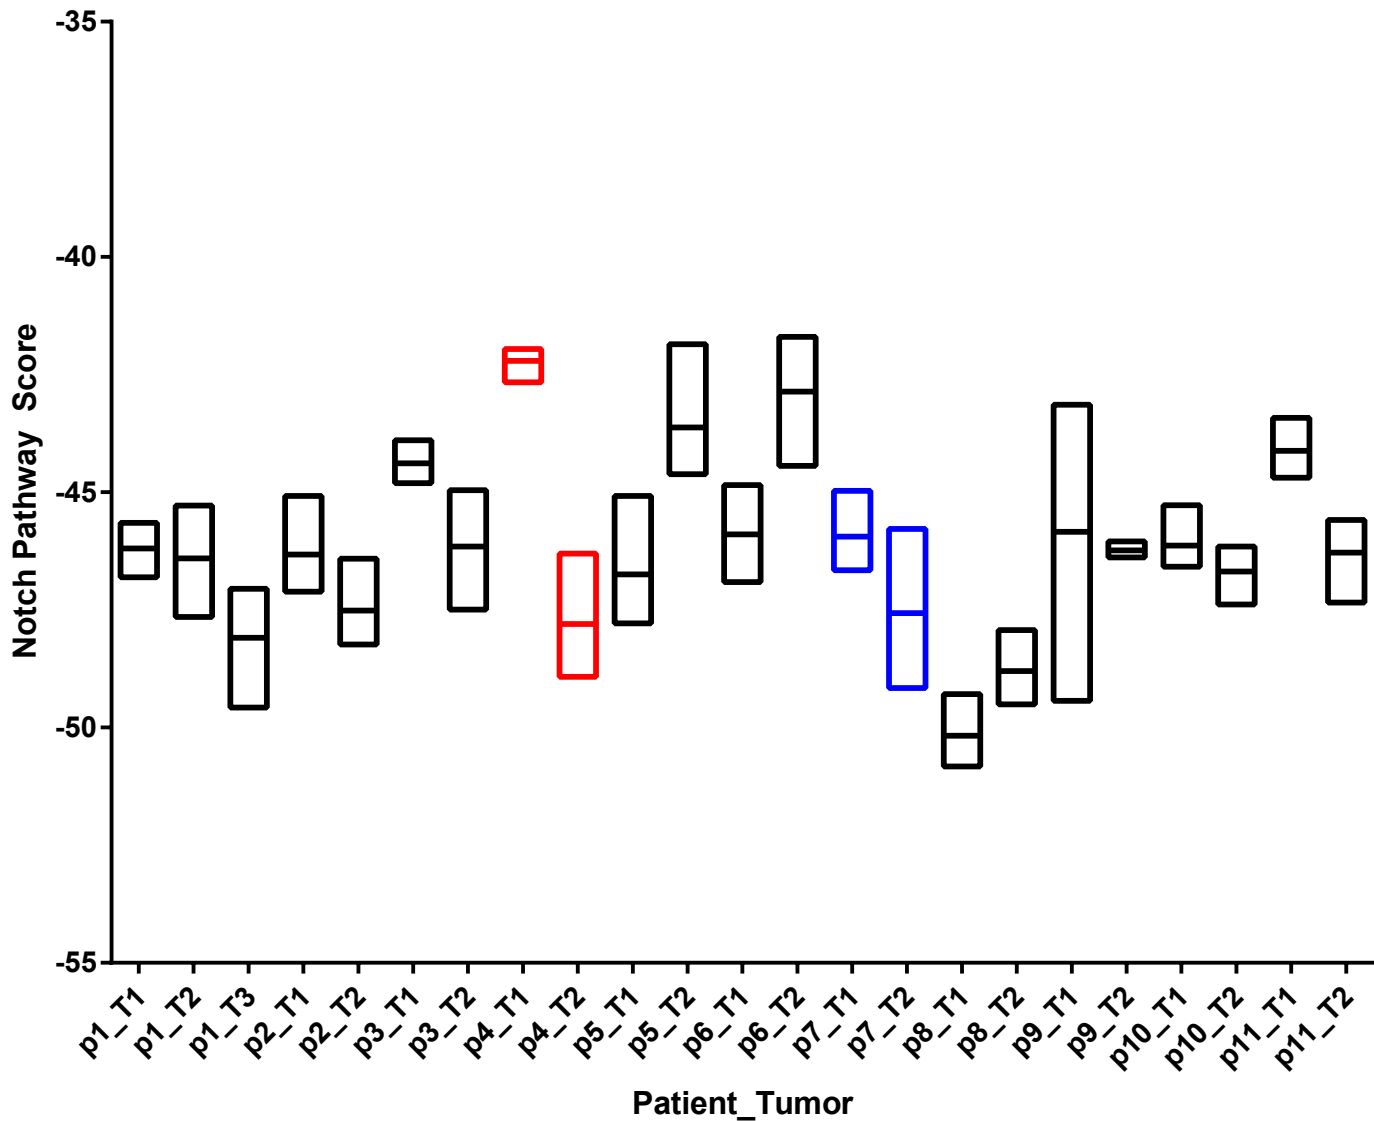

# Wnt

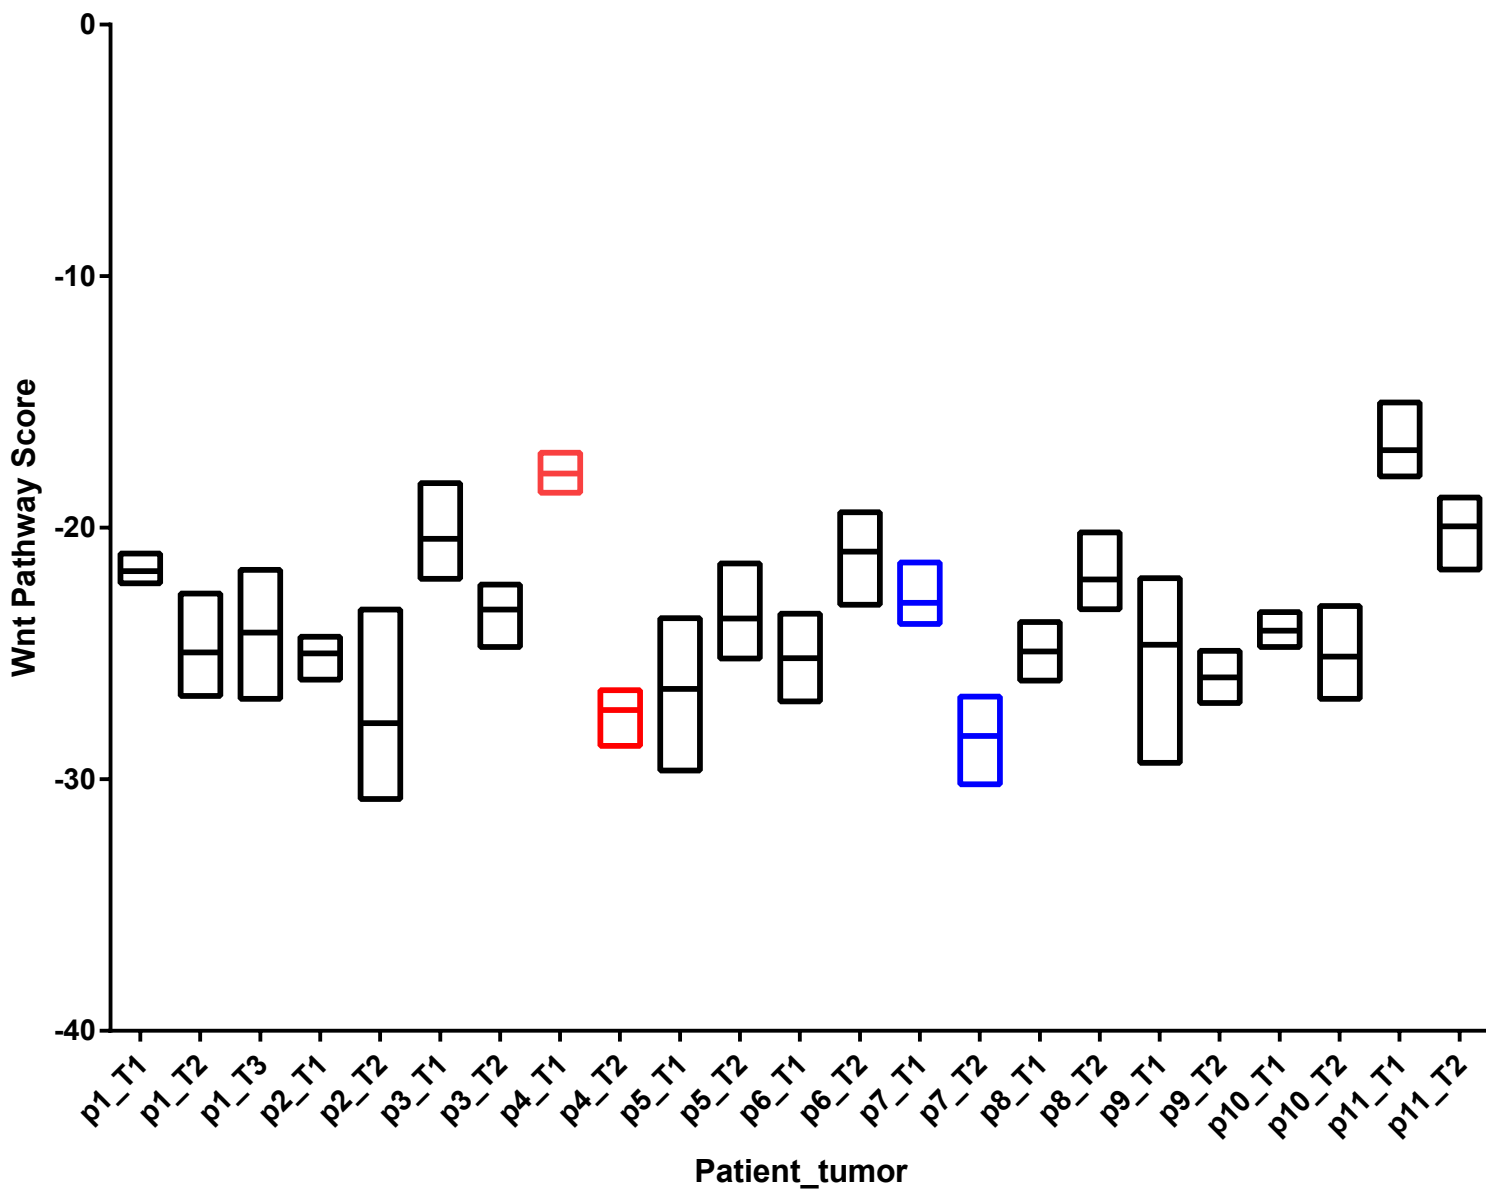

# PI3K

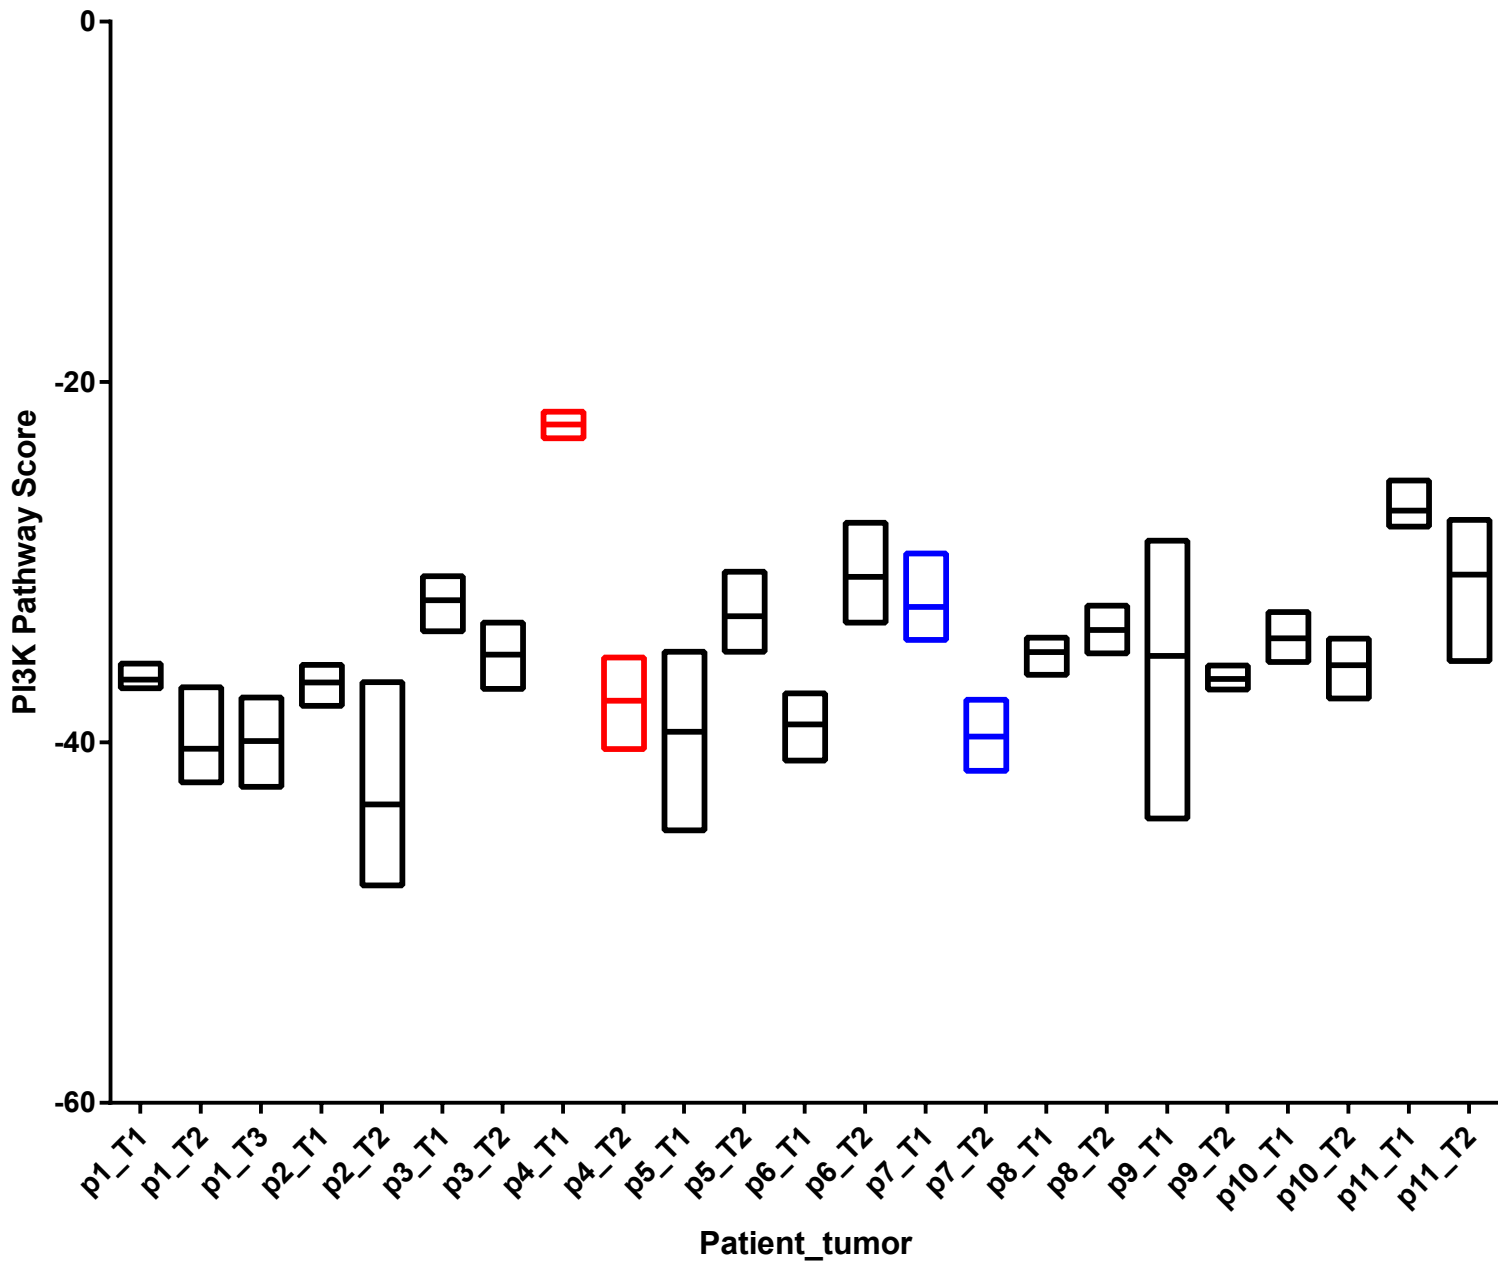

# RAS

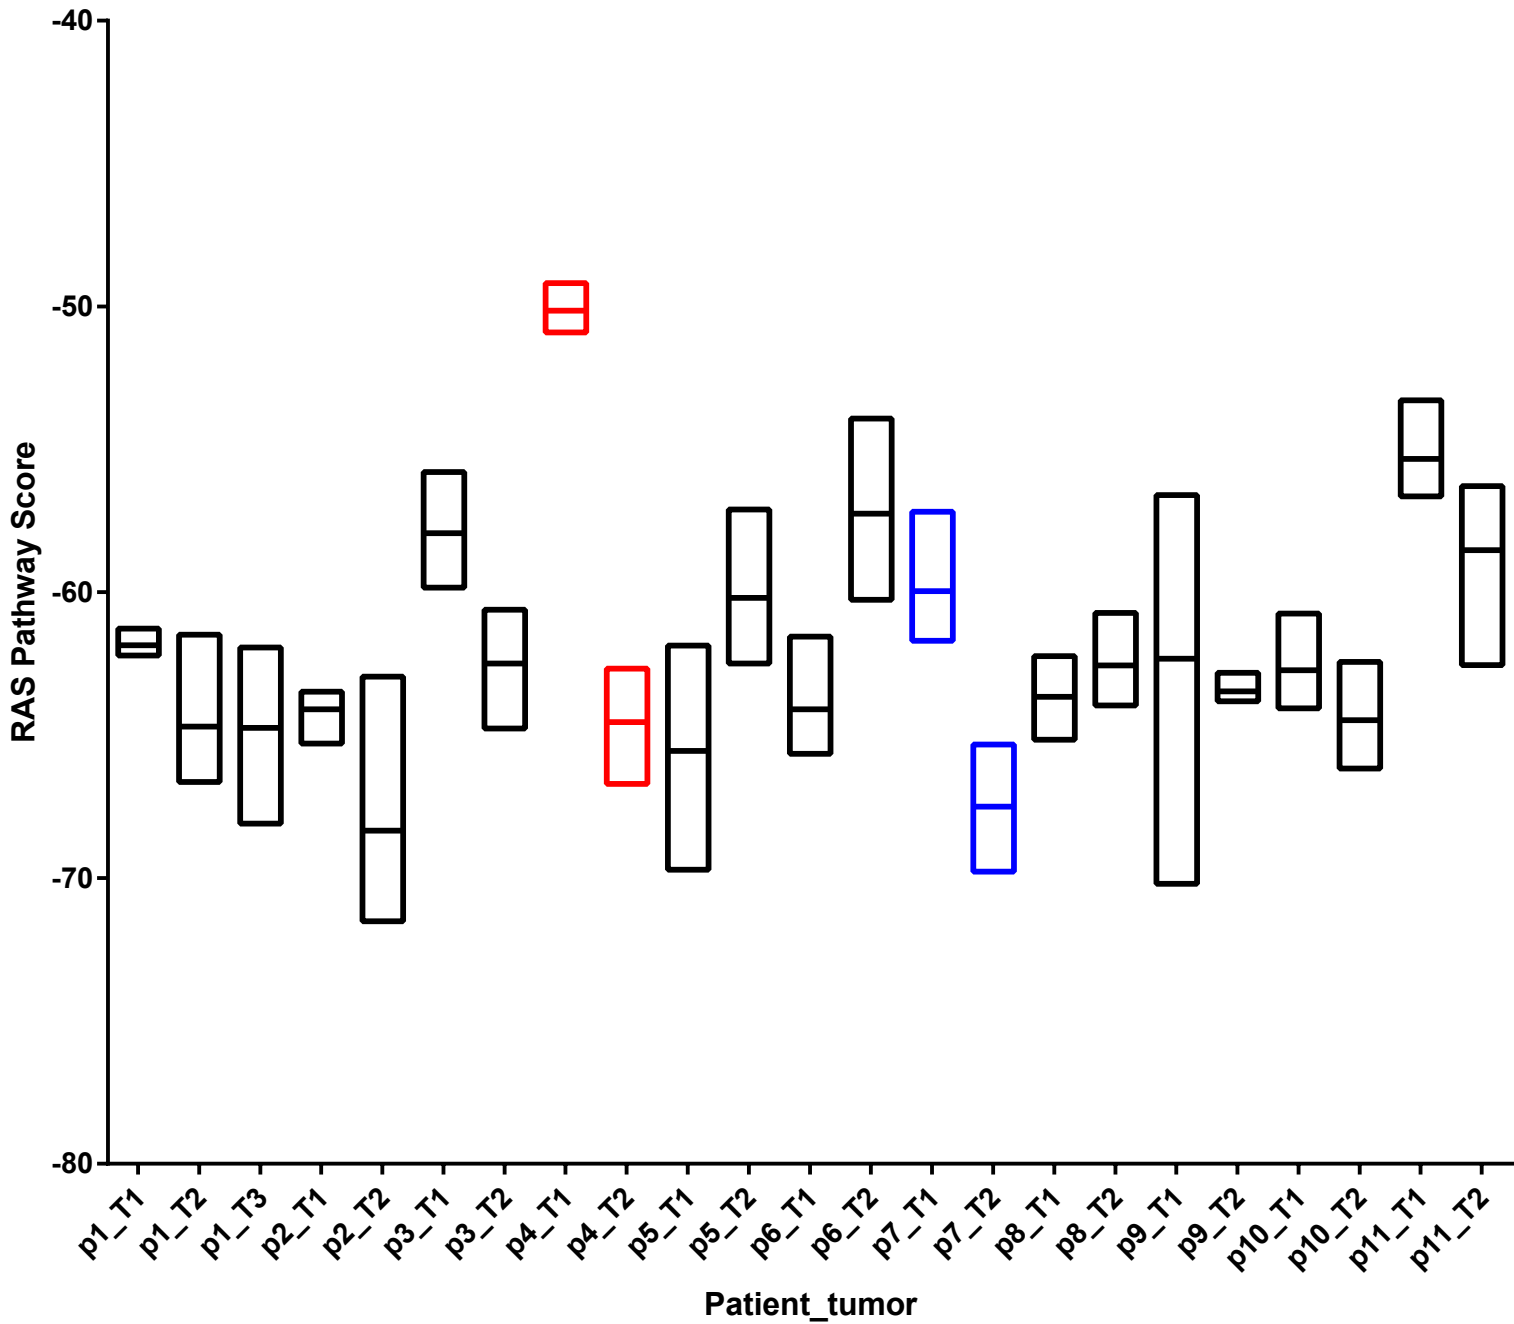

# HedgeHog

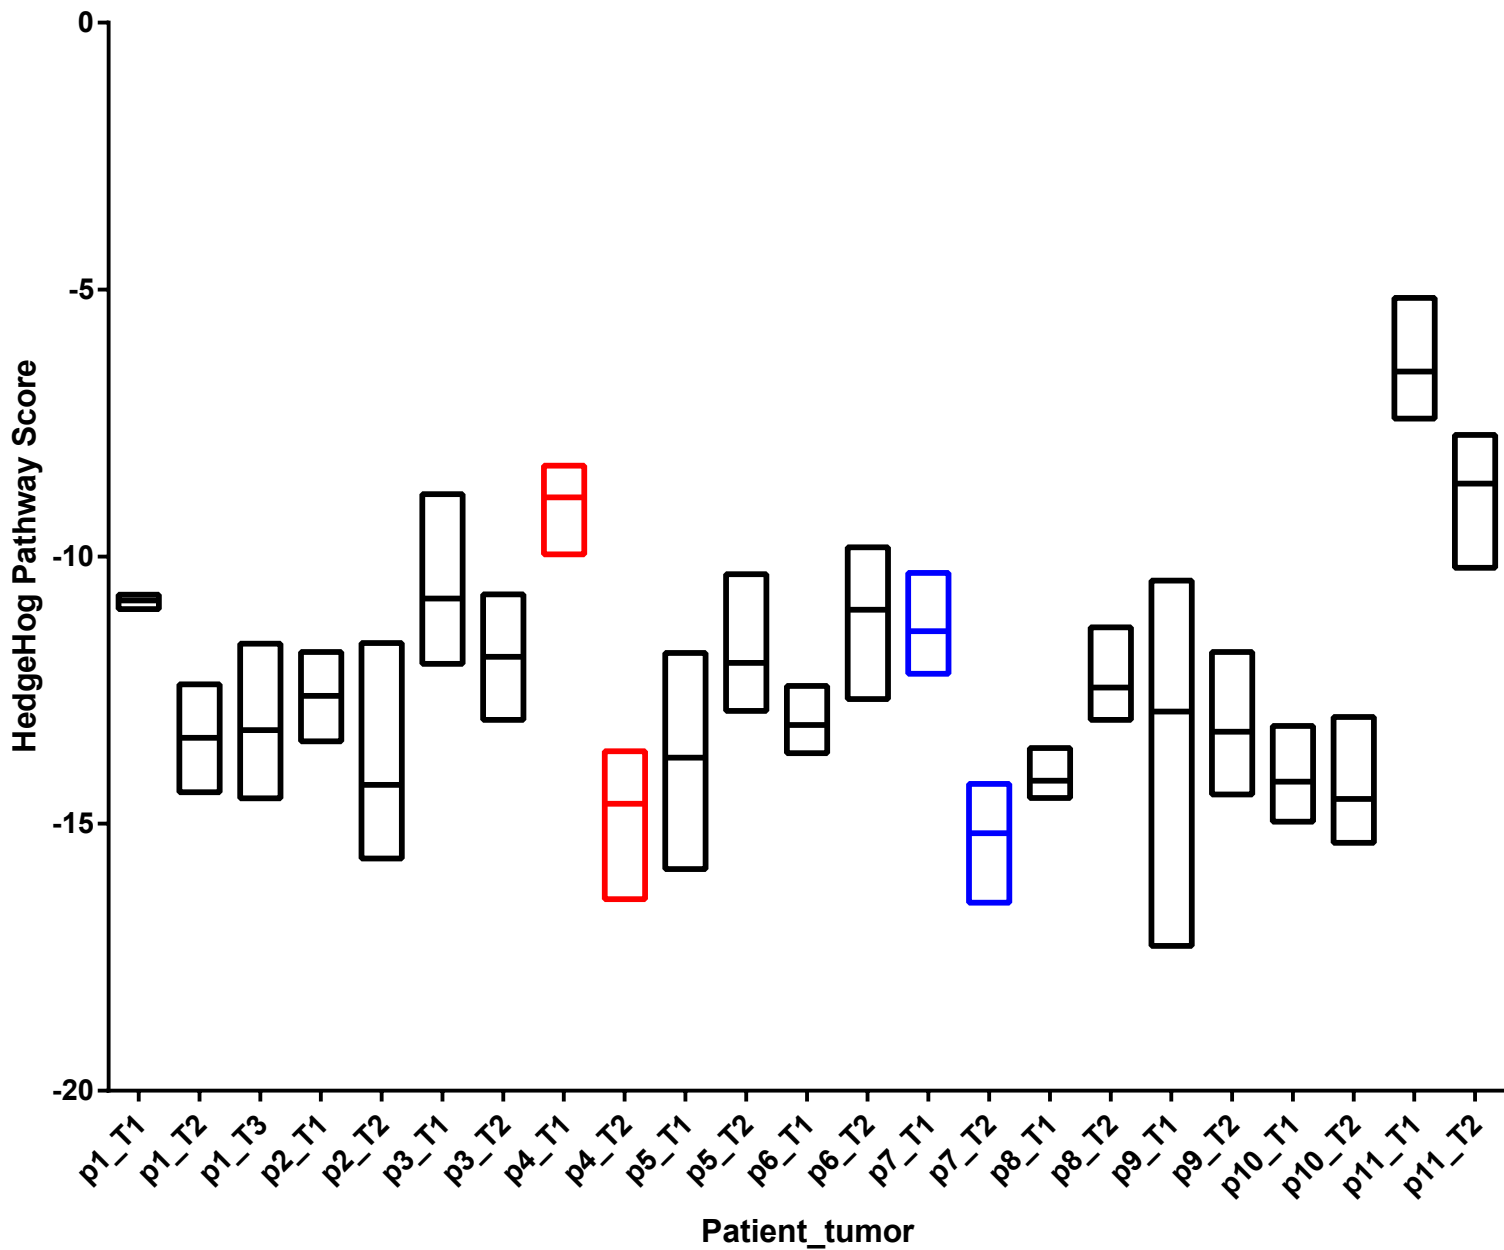

# Chromatin Modification

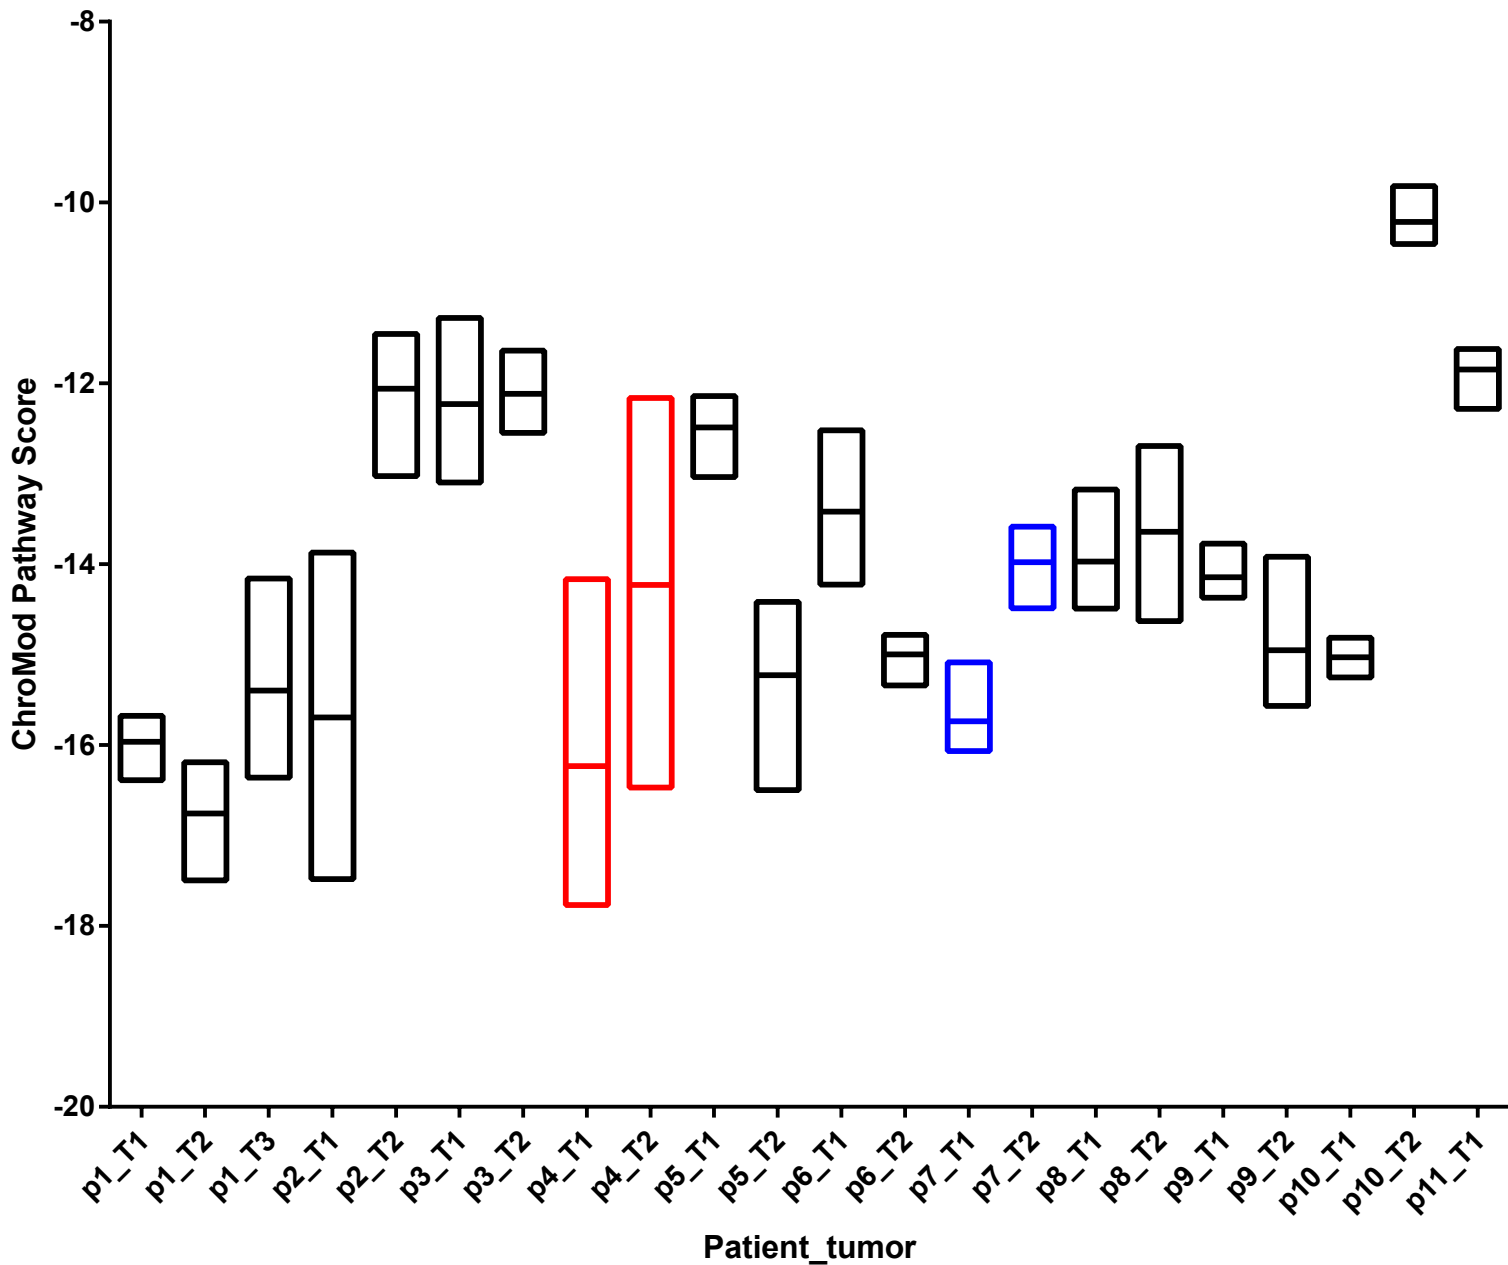

# TxMisReg

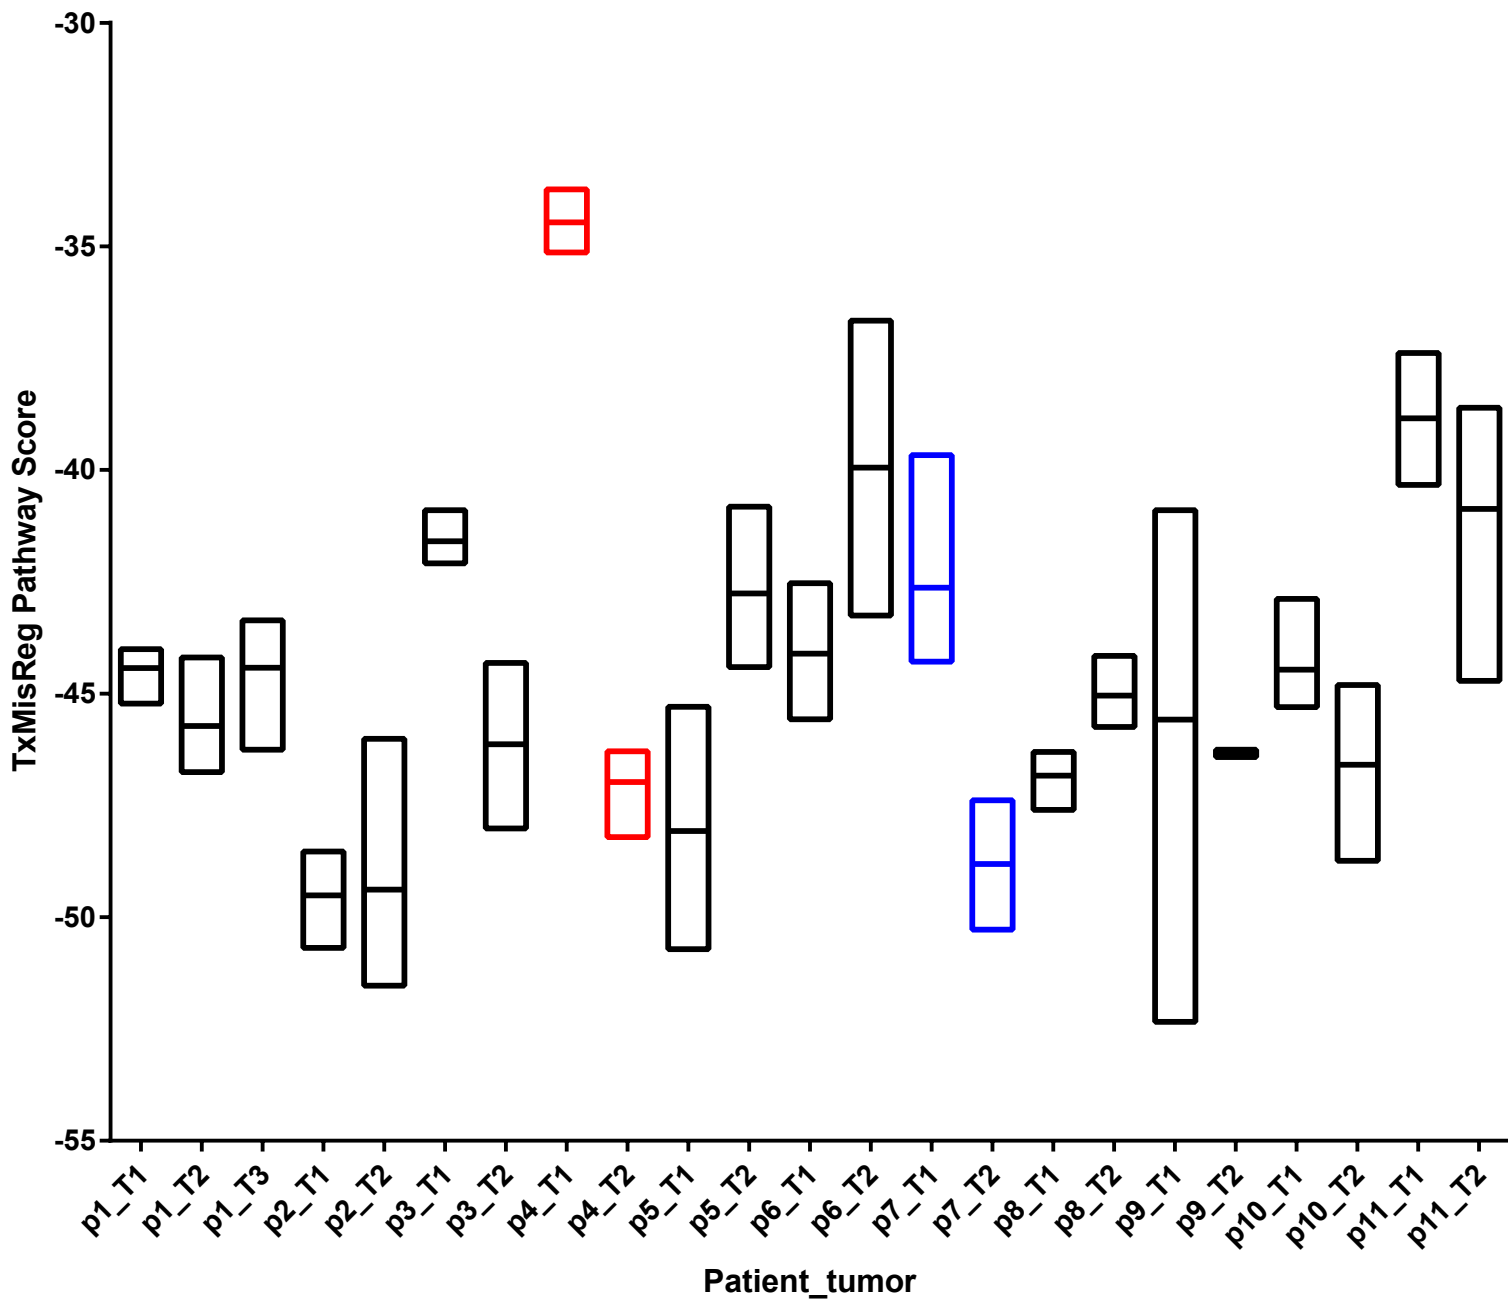

# DNARep

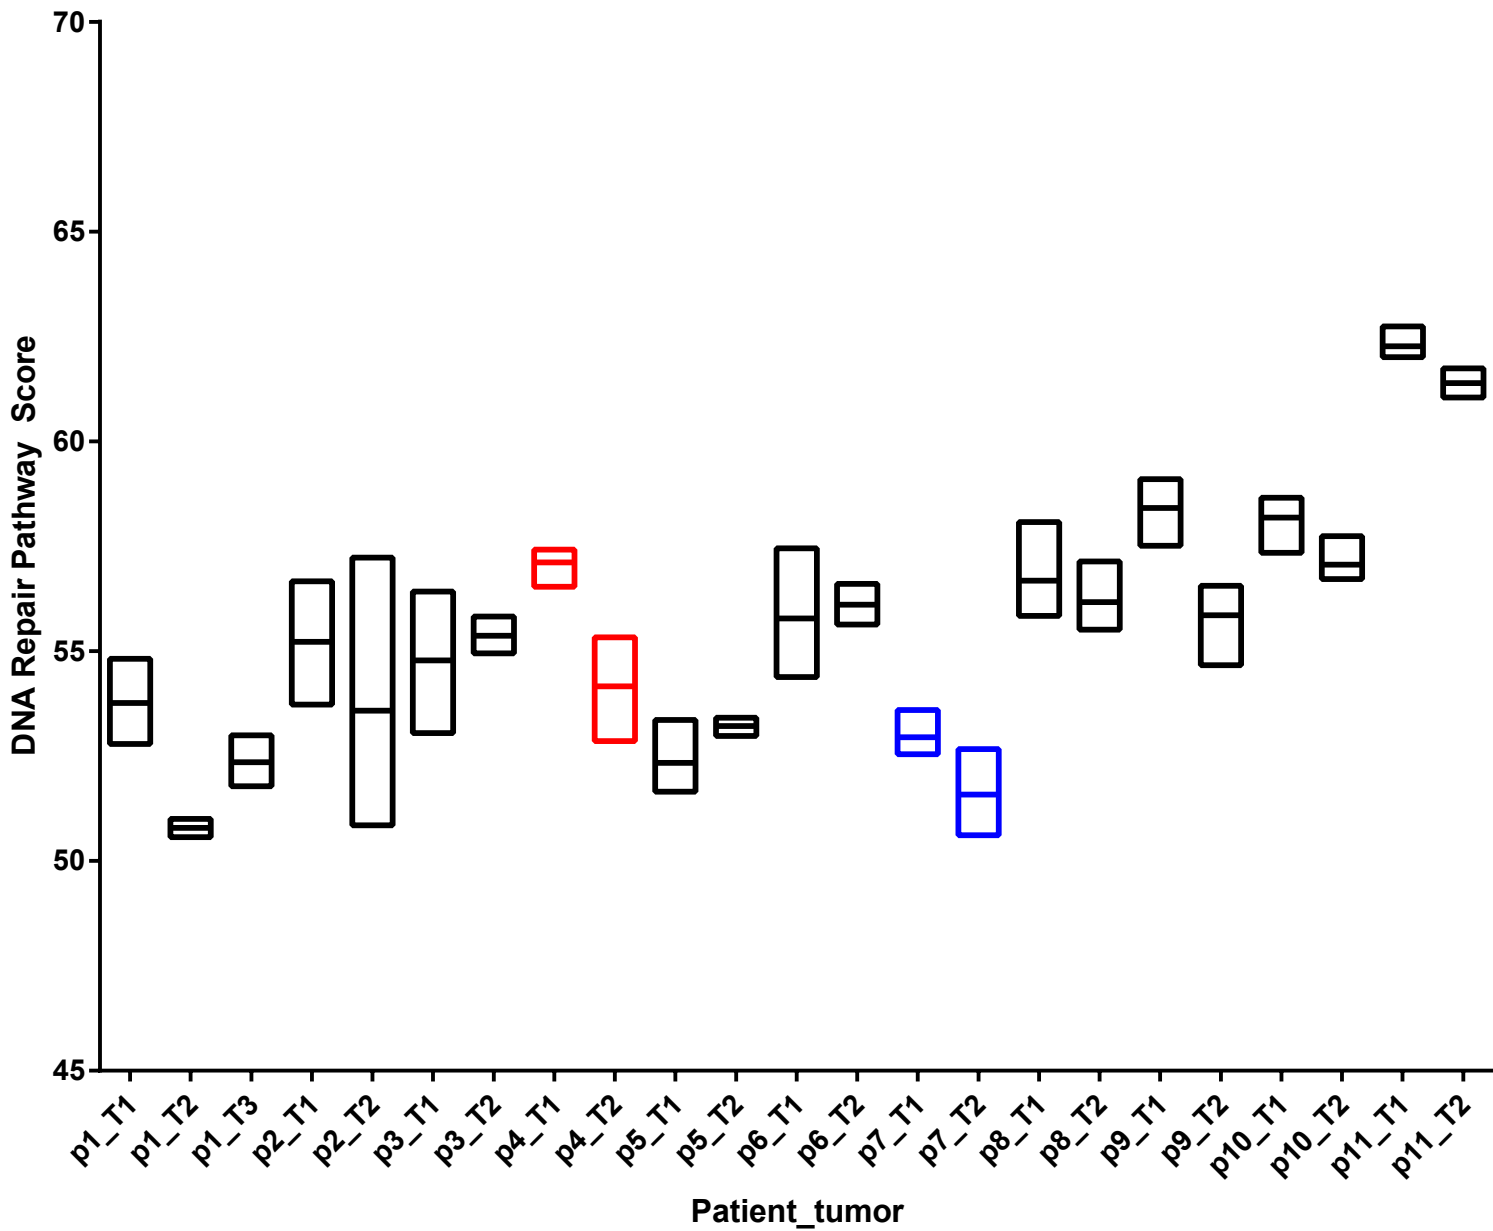



# TGFBeta

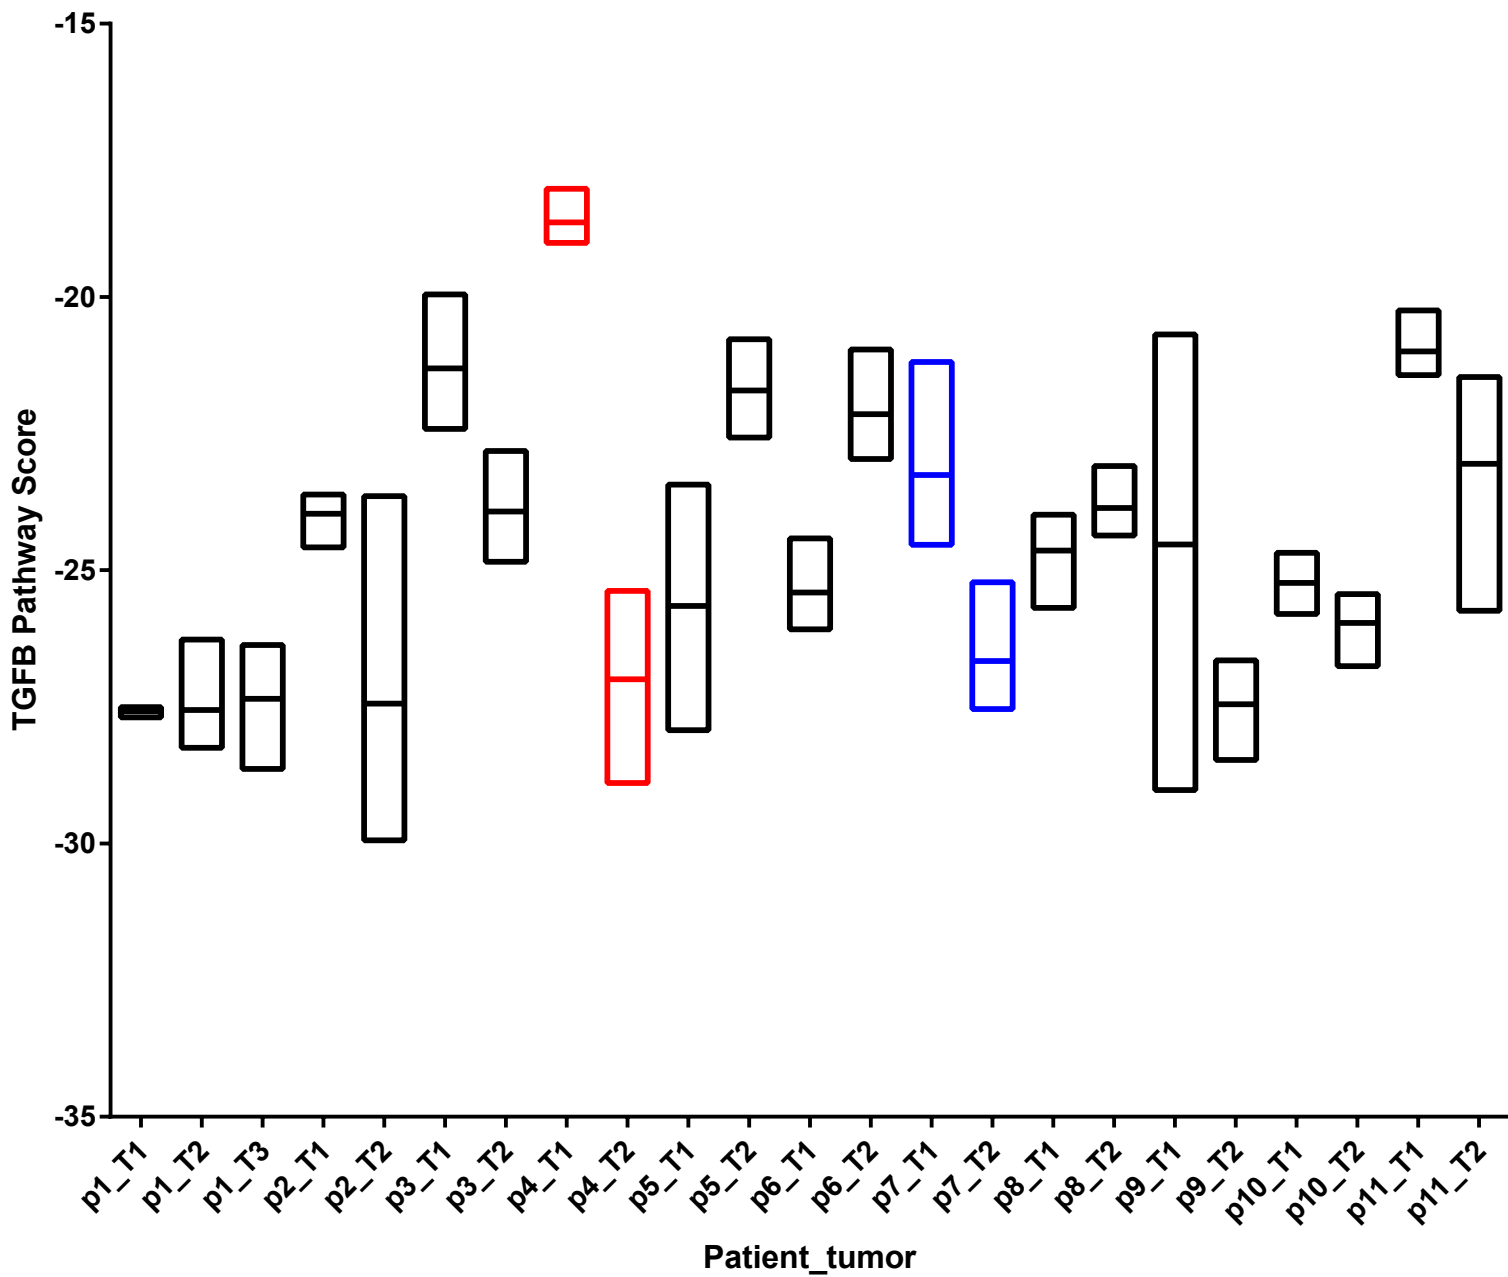

# MAPK

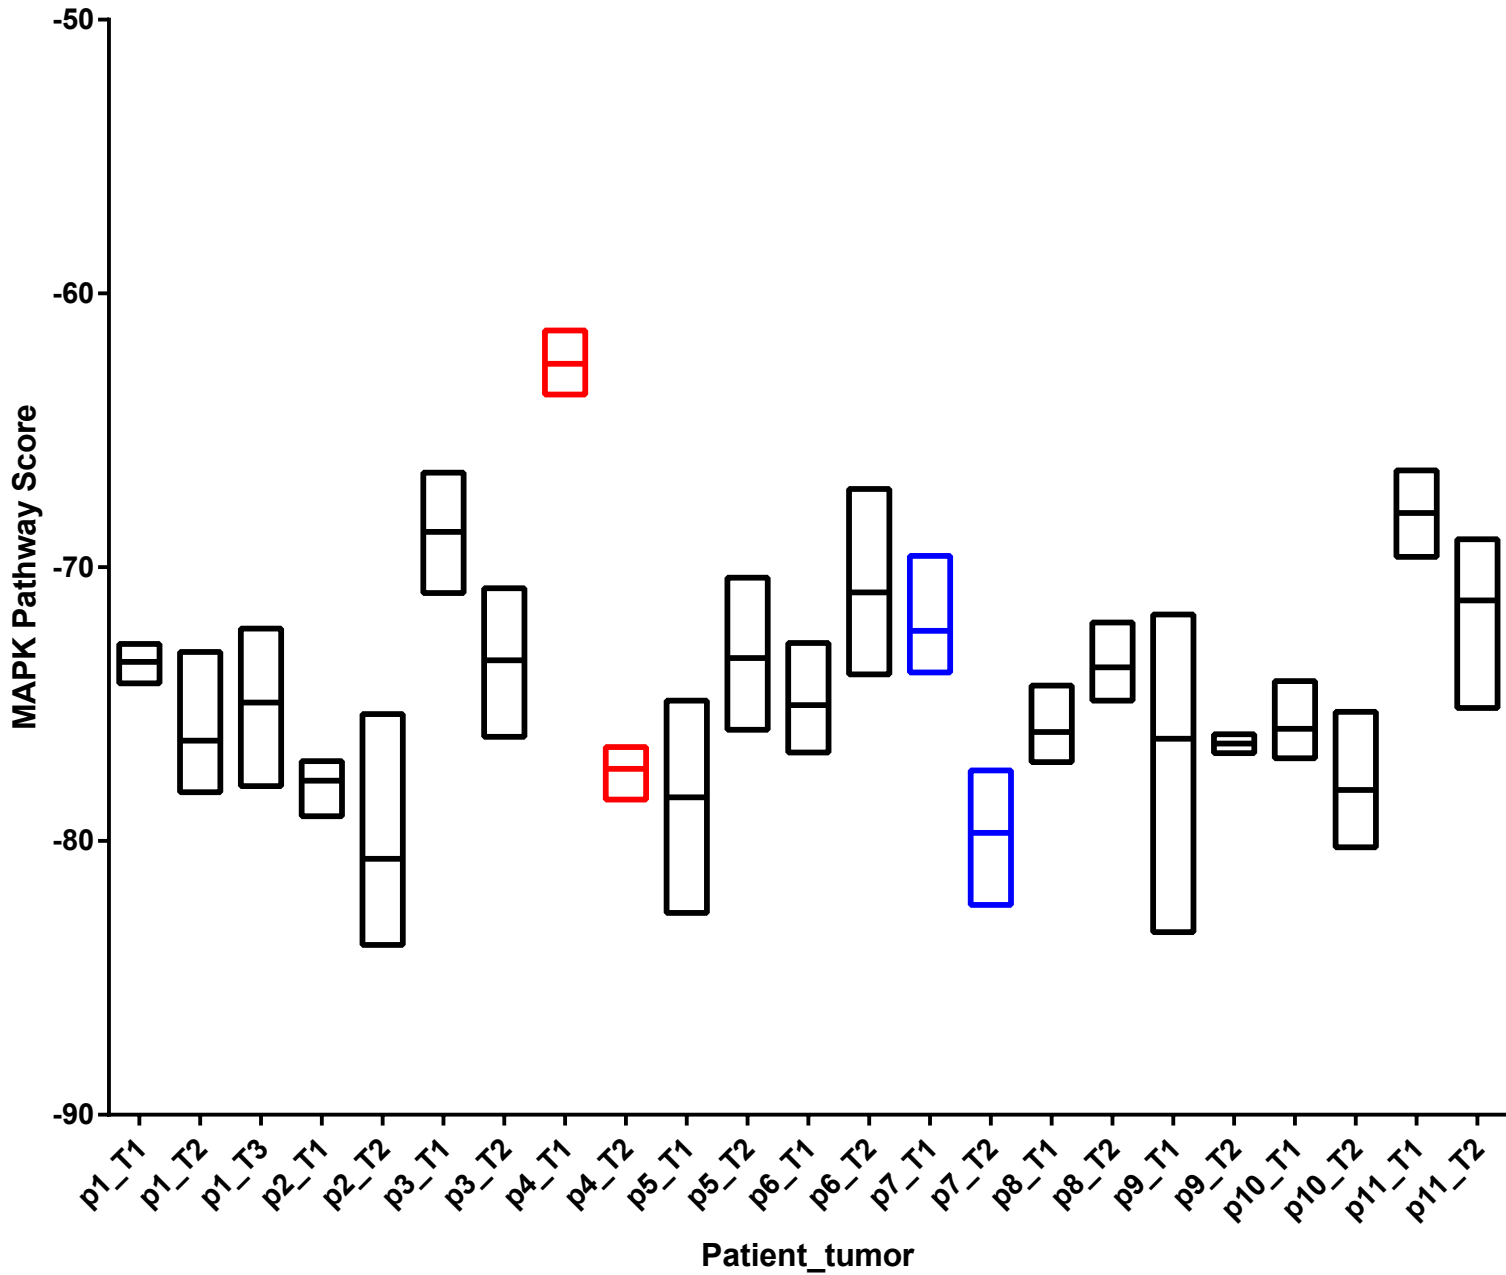

# STAT

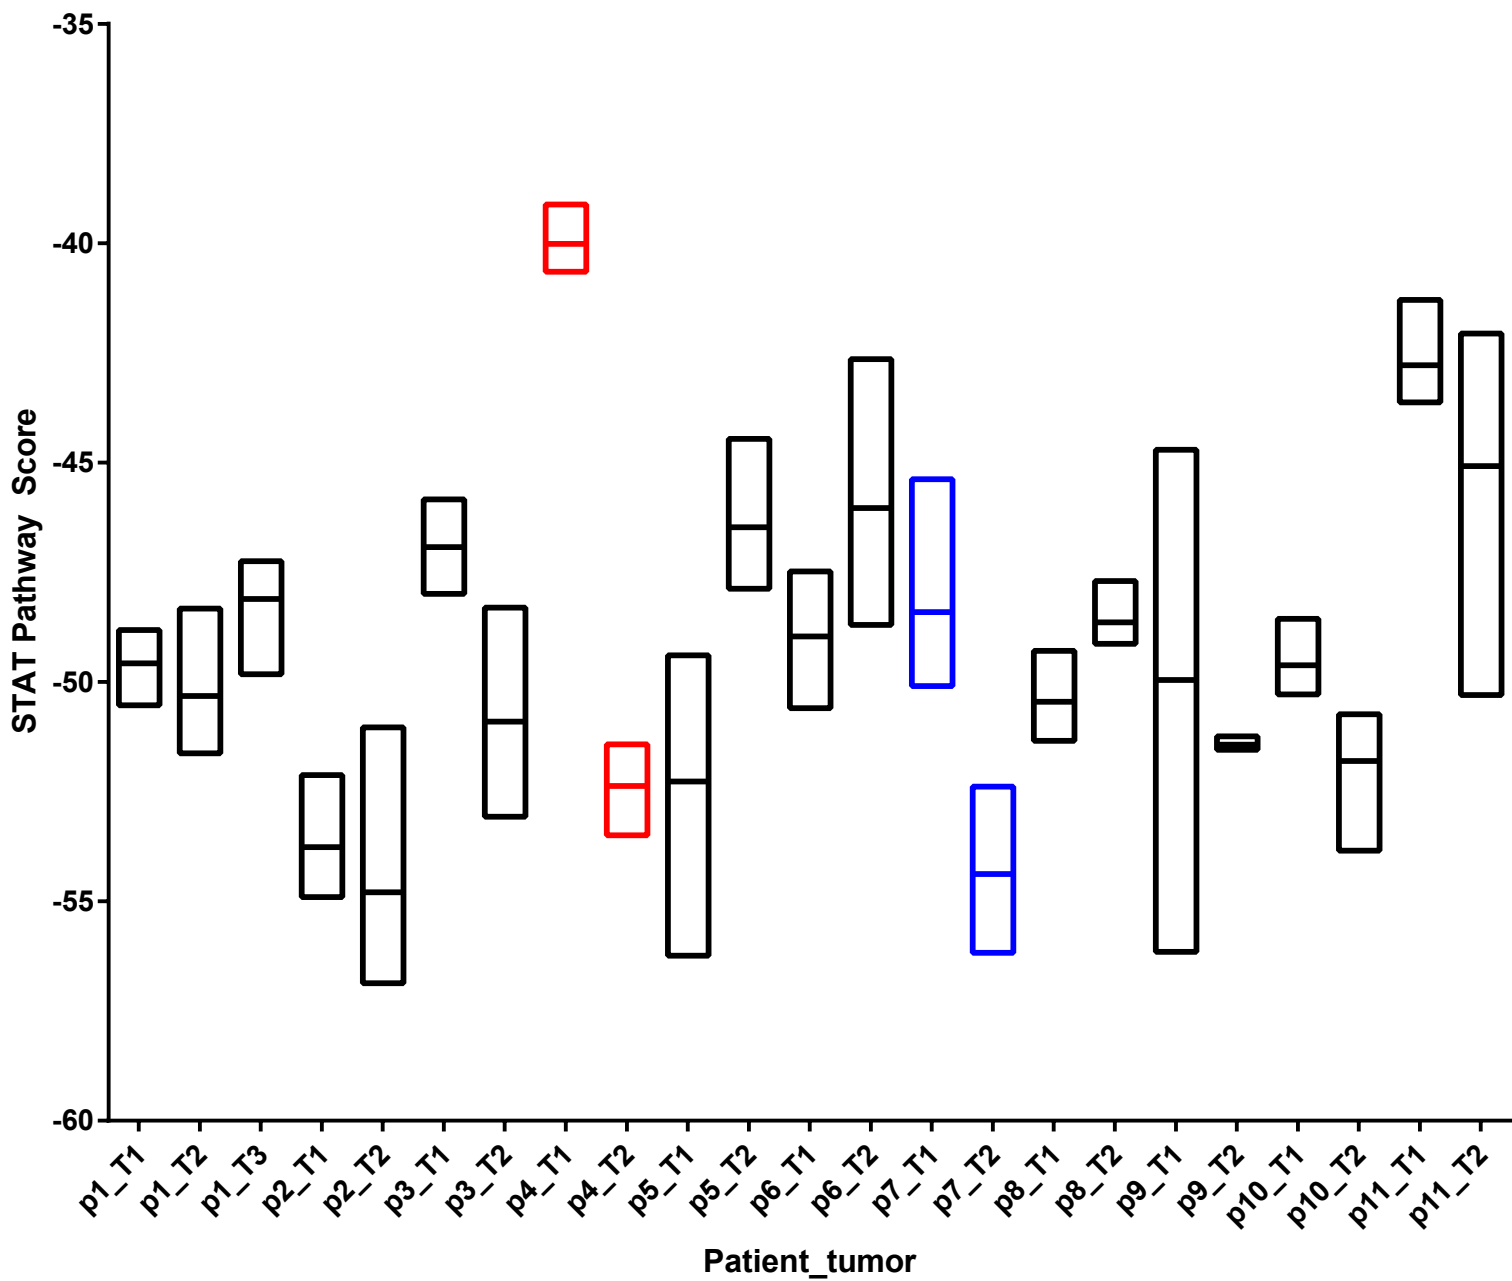

# Apoptosis

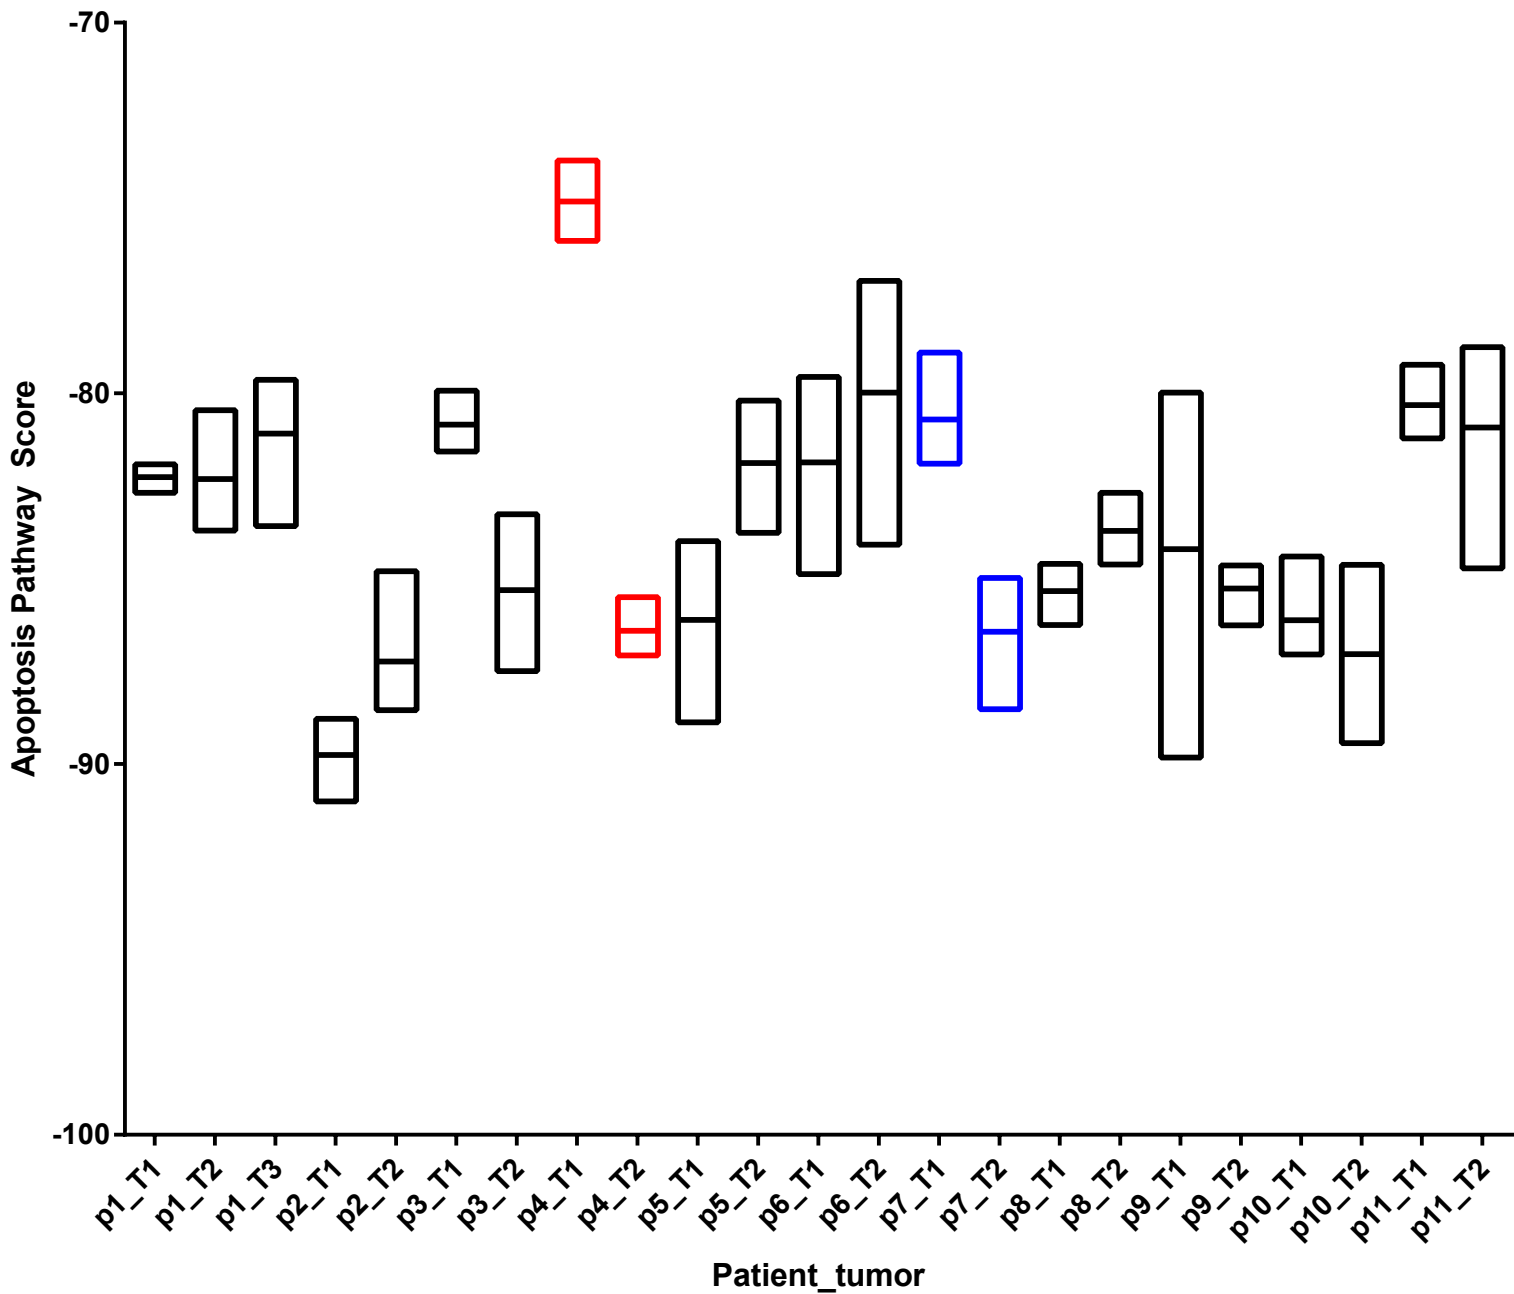

# Cell Cycle

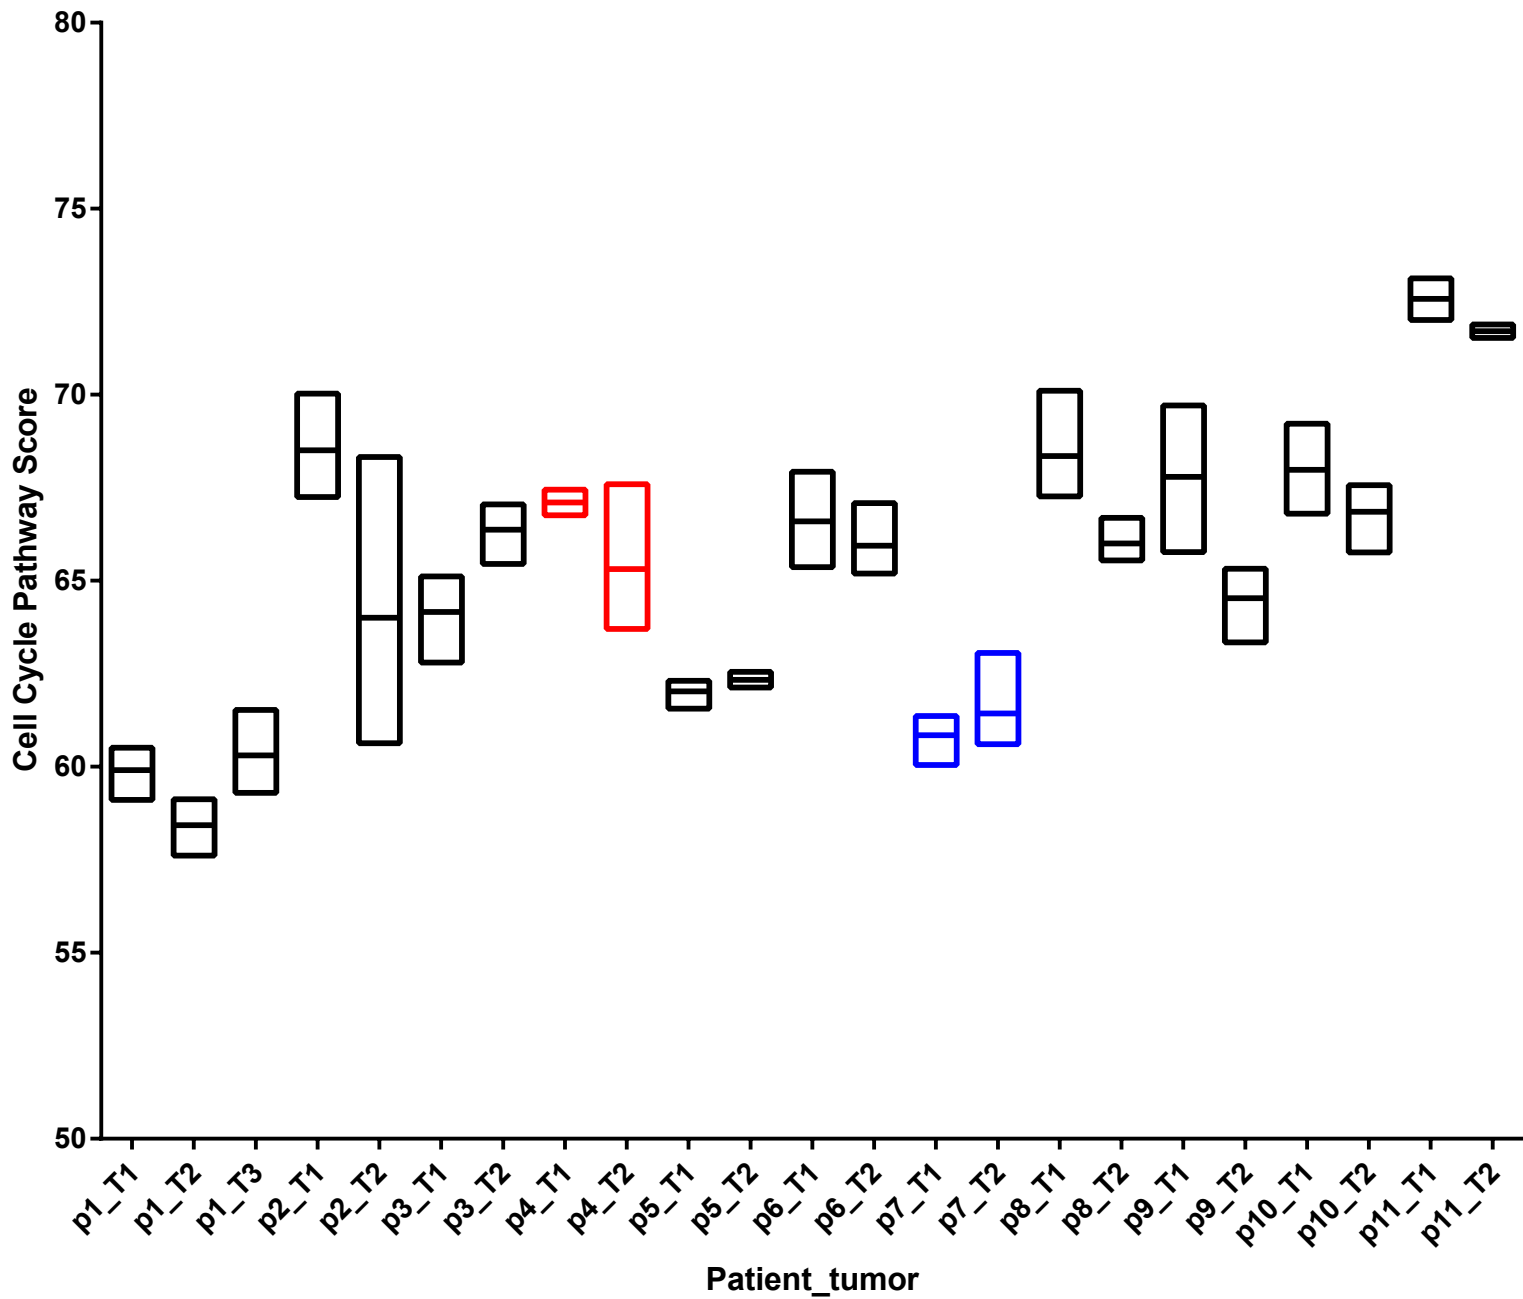

Supplement: pone.0153411.s003.pdf [file pone.0153411.s003.pdf]
